# Supplementary material
Source: Research Square preprint supplement (doi:10.21203/rs.3.rs-6722143/v1)
Supplement: Supplementary file 1 [file e69784dd77b524a05632aac2.pdf]

## Supplementary Information

### **Real-time Crystallographic Capture of Fe–NO Bond Photodissociation in a Nonheme Iron Nitrosyl Complex**

Seungwon Sun<sup>1,6</sup>, Sangho So<sup>3,4,6</sup>, Dohyun Moon<sup>5\*</sup>, Mu-Hyun Baik<sup>3,4\*</sup> and Jaeheung Cho<sup>1,2\*</sup>

<sup>1</sup>Department of Chemistry, Ulsan National Institute of Science and Technology (UNIST), Ulsan  
44919, Republic of Korea

<sup>2</sup>Graduate School of Carbon Neutrality, Ulsan National Institute of Science and Technology  
(UNIST), Ulsan 44919, Republic of Korea.

<sup>3</sup>Department of Chemistry, Korea Advanced Institute of Science and Technology (KAIST),  
Daejeon 34141, Republic of Korea

<sup>4</sup>Center for Catalytic Hydrocarbon Functionalizations, Institute for Basic Science (IBS), Daejeon  
34141, Republic of Korea

<sup>5</sup>Beamline Department, Pohang Accelerator Laboratory, Pohang, Gyeongbuk 37673, Republic of  
Korea

<sup>6</sup>These authors contributed equally to this work

\*Corresponding authors: jaeheung@unist.ac.kr, mbaik2805@kaist.ac.kr, dmoon@postech.ac.kr

## **Table of contents**

I. General experimental details

II. Synthesis

III. Computational Studies

IV. Supplementary Figures

V. Supplementary Tables

VI. References

## I. General experimental details

**Materials.** All reagents and solvents were commercially available from Sigma-Aldrich, TCI, Fisher Scientific, or BOC Science and used without further purification unless otherwise indicated. The diethyl ether (Et<sub>2</sub>O) was purified through solvent purification columns (JC Meyer Solvent Systems) prior to use. The *N,N'*-di-*tert*-butyl-2,11-diaza[3.3](2,6)-*p*-chloropyridinophane (Cl-TBDAP) was synthesized according to the literature procedures<sup>1</sup>.

**Instrumentation.** UV-vis spectra were recorded on a Cary 8454 diode array spectrophotometer equipped with a UNISOKU Scientific Instruments Cryostat USP-203 for -40 °C. Mass spectrometry was performed on electrospray ionization mass spectrometry (ESI-MS, Waters, Acquity SQD quadrupole Mass instrument, detailed parameter: spray voltage; 2.5 kV, capillary temperature; 80 °C), and on cold spray ionization mass spectrometry (CSI-MS, JEOL, JMS-T1000LP 4G, detailed parameter: spray voltage; 2.0 kV, capillary temperature; 40 °C). Infrared (IR) vibrational spectra were recorded on a Thermo Scientific Nicolet iS10 equipped with a diamond attenuated total reflectance (ATR) accessory. X-band continuous wave electron paramagnetic resonance (CW-EPR) spectrum was taken at 100 K using a Bruker EMXplus spectrometer equipped with a dual-mode resonator (ER 4116DM). The low temperature was achieved and controlled with the digital temperature and gas flow control system (ER 4141VT). The experimental parameters for EPR measurement were as follows: Microwave frequency = 9.422 GHz, microwave power = 1.0 mW, modulation amplitude = 5 G, gain =  $1.59 \times 10^4$ , modulation frequency = 100 kHz, time constant = 327.68 ms, and conversion time = 100 ms. <sup>1</sup>H-NMR spectra were measured with an NMR spectrometer (Varian, VNMRS600). Xenon lamp (Asahi Spectra, Max-303, 300 W) was used as a light source for releasing NO• from **2** experiments, and the power of the light (at 532 nm) was measured by using an Economical Handheld Laser Power Meter (Newport, 843-R).

**Magnetic moment measurement.** The effective magnetic moments were determined by the  $^1\text{H}$  NMR Evans method at  $-40\text{ }^\circ\text{C}$  for **2**<sup>2,3</sup>. A WILMAD<sup>®</sup> coaxial insert (sealed capillary) tube containing the blank acetone-*d*<sub>6</sub> solvent (with 0.03% TMS) only was inserted into the normal NMR tube containing the complexes (3 mM) dissolved in acetone-*d*<sub>6</sub> (with 0.03% TMS). The chemical shift of the TMS peak (and/or solvent peak) in the presence of the paramagnetic metal complexes was compared to that of the TMS peak (and/or solvent peak) in the inner coaxial insert tube. The effective magnetic moments were calculated using the equation,  $\mu_{\text{eff}} = 0.0618(\Delta\nu T/2fM)^{1/2}$ , where  $f$  is the oscillator frequency (MHz) of the superconducting spectrometer,  $T$  is the absolute temperature,  $M$  is the molar concentration of the metal ion, and  $\Delta\nu$  is the difference in frequency (Hz) between the two reference signals.

**Purification of nitric oxide.** Nitric oxide (NO<sup>•</sup>) gas was purchased from Korea Standard Gas and purified as follows: NO<sup>•</sup> was passed through two columns filled with NaOH beads and molecular sieves and collected in frozen form in a trap cooled at 77 K with liquid N<sub>2</sub><sup>4,5</sup>. Frozen NO<sup>•</sup> was warmed up to 193 K (Ethanol/dry-ice mixture,  $-80\text{ }^\circ\text{C}$ ), and the highly purified NO<sup>•</sup> was added to the sample in a Schlenk flask fitted with a rubber septum (free from oxygen, after several cycles of vacuum and N<sub>2</sub> purging).

**Photodissociation reaction studies.** Photolysis of **2** and  $[\text{Fe}(\text{TBDAP})(\text{NO})(\text{H}_2\text{O})]^{2+}$  (2 mM) was performed in acetone at  $-40\text{ }^\circ\text{C}$  upon photo-illumination. Broadband light from a xenon lamp was employed as a photon source. The progress of photolysis was monitored by employing UV–vis absorption spectrophotometer. The sample was delivered into a quartz cuvette (beam path length = 1 cm) under aerobic conditions, and UV–vis absorption spectra were recorded during photo-illumination. The xenon lamp was positioned at a distance of  $\sim 4.2$  cm from the quartz cuvette  $90^\circ$  to the UV–vis beam. All photolysis experiments were carried

out in triplicate. The photoproduct of **2** was further analyzed by ESI-MS (Supplementary Figure S8).

**Stability test.** To test the chemical stability of **2** in acetone, we measured the UV–vis spectrum for 1500 seconds without irradiation of the light and compared the temporal changes in the absorbance at 515 nm with the results from photolysis (Figure 2). Cycle time set as 10 seconds shows that there is no decomposition of **2** for 1500 seconds.

**X-ray crystallography.** Single crystal of **1**-(OTf) for X-ray diffraction were obtained from solutions using a nylon loop (Hampton Research Co.) on a handmade copper plate at  $-40\text{ }^{\circ}\text{C}$  and mounted on a goniometer head in an  $\text{N}_2$  cryostream at 173 K. Data collections were carried out on an image plate diffractometer equipped with a monochromator using Mo  $K_{\alpha}$  radiation ( $\lambda = 0.71073\text{ \AA}$ ) incident beam. The diffraction data were integrated and scaled using the Rigaku Rapid Auto software package. Pristine single crystal of **2**-(OTf) $_2$ -CH $_3$ COCH $_3$  was coated with Parabar 10312 (Hampton Research Co.) and mounted on the cryo-loop (MiTeGen LLC). The data collection was carried out using a synchrotron-based X-ray source ( $\lambda = 0.70000\text{ \AA}$ ) produced from a PLS-II 2D bending magnet with a silicon(111) double crystal monochromator and Rayonix MS225HS CCD area detector at 235 K. BL2D-SMDC program<sup>6</sup> was used for one set of data collection at the following conditions: detector distance of 66 mm, 1-axis omega scan with  $\Delta\omega$  of  $3^{\circ}$  and the exposure time of 1 sec/frame. HKL3000sm (Ver. 717.6)<sup>7</sup> was used for cell refinement, reduction, and absorption correction. The structures were solved by the intrinsic phasing method using SHELXT-2018/2<sup>8</sup> and refined by full-matrix least-squares on  $F^2$  using SHELXL-2019/3<sup>9</sup>. All non-hydrogen atoms were refined anisotropic and all H atoms were placed in geometrically idealized positions and constrained to ride on their parent atoms with C—H = 0.94 – 0.98  $\text{\AA}$  with  $U_{\text{iso}}(\text{H})$  values of 1.2 and 1.5  $U_{\text{eq}}$  of the parent

atoms. The O-bound H atoms of the coordinated water molecules of **2**-(OTf)<sub>2</sub>·CH<sub>3</sub>COCH<sub>3</sub> were assigned based on a difference-Fourier map and were refined with distance restraints of 0.95 Å (using the DFIX and DANG commands), and  $U_{\text{iso}}(\text{H})$  values of  $1.5U_{\text{eq}}$  of the oxygen atom. Some SHELXL restrains (DFIX, DANG, ISOR and RIGU) had to be used to correct the geometry of the disordered parts (OTf<sup>-</sup>) and the thermal parameters of the corresponding atoms. The crystallographic data for **1**-(OTf) and **2**-(OTf)<sub>2</sub>·CH<sub>3</sub>COCH<sub>3</sub> are listed in Tables S1 and Tables S2 list the selected bond distances and angles, respectively. Crystal data for **1**-(OTf): C<sub>26</sub>H<sub>33</sub>Cl<sub>2</sub>F<sub>6</sub>FeN<sub>5</sub>O<sub>6</sub>S<sub>2</sub>, Triclinic,  $P\bar{1}$ ,  $Z = 2$ ,  $a = 10.455(2)$ ,  $b = 13.987(3)$ ,  $c = 14.498(3)$  Å,  $\beta = 76.06(3)^\circ$ ,  $V = 1950.6(8)$  Å<sup>3</sup>,  $\mu = 0.700$  mm<sup>-1</sup>,  $\rho_{\text{calcd}} = 1.390$  g/cm<sup>3</sup>,  $R_1 = 0.0420$ ,  $wR_2 = 0.1042$  for 6862 unique reflections, 440 variables. Crystal data for **2**-(OTf)<sub>2</sub>·CH<sub>3</sub>COCH<sub>3</sub>: C<sub>27</sub>H<sub>38</sub>Cl<sub>2</sub>F<sub>6</sub>FeN<sub>5</sub>O<sub>9</sub>S<sub>2</sub>, Monoclinic,  $P2_1/c$ ,  $Z = 4$ ,  $a = 16.573(3)$ ,  $b = 11.195(2)$ ,  $c = 20.950(4)$  Å,  $\beta = 105.62(3)^\circ$ ,  $V = 3743.4(14)$  Å<sup>3</sup>,  $\mu = 0.705$  mm<sup>-1</sup>,  $\rho_{\text{calcd}} = 1.564$  g/cm<sup>3</sup>,  $R_1 = 0.0691$ ,  $wR_2 = 0.2132$  for 6848 unique reflections, 548 variables. CCDC-2452720 for **1**-(OTf) and 242919 for **2**-(OTf)<sub>2</sub>·CH<sub>3</sub>COCH<sub>3</sub> contain the supplementary crystallographic data for this paper. These data can be obtained free of charge via [www.ccdc.cam.ac.uk/data\\_request/cif](http://www.ccdc.cam.ac.uk/data_request/cif) (or from the Cambridge Crystallographic Data Centre, 12, Union Road, Cambridge CB2 1EZ, UK; fax: (+44) 1223-336-033; or [deposit@ccdc.cam.ac.uk](mailto:deposit@ccdc.cam.ac.uk)).

### **In-situ photocrystallography single crystal diffraction for 2-(OTf)<sub>2</sub>·CH<sub>3</sub>COCH<sub>3</sub>.**

Measurements were conducted under identical conditions as those used for the pristine single crystal, with UV-vis light irradiation. The parameters for each dataset acquisition were as follows:  $\Delta\omega = 5^\circ$ , with an exposure time of 1 second per frame, covering 120 frames over 360° rotation, totaling 120 seconds. Data collection initiation and completion were controlled by the CCD detector's trigger in/out signal. Accounting for the CCD preparation time of 5 seconds before and after data collection, the total acquisition time for each dataset was 130 seconds.

The crystal remained continuously exposed to UV-vis light for a total of 6,500 seconds, with each dataset captured every 130 seconds in response to the CCD detector's trigger signal. Under continuous UV-vis light irradiation, a gradual decrease in crystallinity and a reduction in high-angle diffraction intensity were observed. While this resulted in slight data degradation, no significant structural issues were detected. Each dataset from 130 to 6,500 seconds, with file numbers from CCDC-2452920 to 2452969, respectively, contains the supplementary crystallographic data for this paper. These data can be obtained free of charge via [www.ccdc.cam.ac.uk/data\\_request/cif](http://www.ccdc.cam.ac.uk/data_request/cif) (or from the Cambridge Crystallographic Data Centre, 12, Union Road, Cambridge CB2 1EZ, UK; fax: (+44) 1223-336-033; or [deposit@ccdc.cam.ac.uk](mailto:deposit@ccdc.cam.ac.uk)).

## II. Synthesis

**1. Preparation of [Fe<sup>II</sup>(Cl-TBDAP)(CH<sub>3</sub>CN)(OTf)](OTf) (**1**-(OTf)).** The Cl-TBDAP (210.7 mg, 0.5 mmol) ligand in CHCl<sub>3</sub> (2 mL) was added to the solution of anhydrous FeCl<sub>2</sub> (63.3 mg, 0.5 mmol) in CH<sub>3</sub>CN (2 mL) and the reaction mixture was stirred overnight under N<sub>2</sub>. After the reaction, two equivalents of AgOTf (259.5 mg, 1 mmol) in CH<sub>3</sub>CN (1 mL) were added to the reaction mixture and stirred for 30 min. The white solid of AgCl was precipitated and filtered by a disk filter. The yellow powder of **1** was isolated by adding excess Et<sub>2</sub>O and dried under vacuum. Obtained complex **1** was redissolved in CH<sub>3</sub>CN and crystallized by slow Et<sub>2</sub>O diffusion. The greenish-yellow crystal was obtained. Yield: 231.8 mg (56.8%); UV-vis in acetone:  $\lambda_{\max}$  ( $\epsilon$ ) = 387 nm (445 M<sup>-1</sup> cm<sup>-1</sup>); ESI-MS ( $m/z$ ) in CH<sub>3</sub>CN: [Fe<sup>II</sup>(Cl-TBDAP)(CH<sub>3</sub>CN)]<sup>2+</sup> calcd. for C<sub>24</sub>H<sub>33</sub>Cl<sub>2</sub>FeN<sub>5</sub>, 258.6; found, 258.8, [Fe<sup>II</sup>(Cl-TBDAP)(CH<sub>3</sub>CN)(H<sub>2</sub>O)]<sup>2+</sup> calcd. for C<sub>24</sub>H<sub>35</sub>Cl<sub>2</sub>FeN<sub>5</sub>O, 267.6; found, 267.5, [Fe<sup>II</sup>(Cl-TBDAP)(CH<sub>3</sub>CN)<sub>2</sub>]<sup>2+</sup> calcd. for C<sub>26</sub>H<sub>36</sub>Cl<sub>2</sub>FeN<sub>6</sub>, 279.0; found, 279.1, and [Fe<sup>II</sup>(Cl-TBDAP)(CH<sub>3</sub>CN)<sub>2</sub>(H<sub>2</sub>O)]<sup>2+</sup> calcd. for C<sub>26</sub>H<sub>38</sub>Cl<sub>2</sub>FeN<sub>6</sub>O, 288.1; found, 288.0; analysis

(calcd., found for  $C_{24}H_{30}Cl_2F_6FeN_4O_6S_2$ ): C (37.18, 36.92), H (3.90, 3.85), N (7.23, 6.99). The elemental analysis (EA) result showed that solvent in  $[Fe^{II}(Cl-TBDAP)(CH_3CN)(OTf)](OTf)$  may fall off according to previously reported literature<sup>10</sup>.

## 2. Preparation of $[Fe(Cl-TBDAP)(NO)(H_2O)](OTf)_2 \cdot CH_3COCH_3 (2-(OTf)_2 \cdot CH_3COCH_3)$ .

The purified excess NO<sup>•</sup> gas was added to the solution of precursor **1** (50 mg, 0.06 mmol) in acetone (3 mL) at  $-20$  °C under N<sub>2</sub>. The yellow solution of **1** turned to reddish-brown nitrosyl complex **2** upon the addition of NO<sup>•</sup> gas. The nitrosyl complex **2** was crystalized by Et<sub>2</sub>O layering and stored at  $-40$  °C for 2 days. The brown crystals of **2** were obtained and washed by Et<sub>2</sub>O three times and dried under vacuum. Yield: 38.8 mg (77.5%); ATR-IR (crystal): 1766  $cm^{-1}$  ( $\nu_{NO}$ ); UV-vis in acetone:  $\lambda_{max}$  ( $\epsilon$ ) = 408 nm ( $1027 M^{-1} cm^{-1}$ ), 515 ( $351 M^{-1} cm^{-1}$ ), and 741 nm ( $138 M^{-1} cm^{-1}$ ); EPR in acetone at 100 K:  $g = 3.71, 1.99$ ; effective magnetic moment: 4.26  $\mu_B$ ; CSI-MS ( $m/z$ ) in acetone:  $[Fe(Cl-TBDAP)(NO)(CH_3COCH_3)]^{2+}$  calcd. for  $C_{25}H_{36}Cl_2FeN_5O_2$ , 282.0; found, 282.1 and  $[Fe(Cl-TBDAP)(NO)(OTf)]^+$  calcd. for  $C_{23}H_{30}Cl_2F_3FeN_5O_4S$ , 655.1; found, 654.9; analysis (calcd., found for  $C_{27}H_{38}Cl_2F_6FeN_5O_9S_2$ ): C (36.79, 36.63), H (4.35, 4.77), N (7.95, 7.99).

## III. Computational Studies

**1. Computational Details.** All molecular structures except for the excited states mentioned below were carried out using DFT<sup>11</sup> as implemented in ORCA 4.2.0.<sup>12</sup> Geometry optimizations were performed with the B3LYP including Grimme's D3 dispersion correction with Becke-Johnson damping<sup>13-18</sup>. Geometry optimizations and analytical vibrational frequency calculations were carried out with the def2-SVP basis set<sup>19</sup>. For all optimized structures, the intermediates were confirmed with no imaginary vibrational frequency, while transition states showed a single imaginary frequency with a motion corresponding to the proper transitions.

The solvated energies of optimized structures were re-evaluated by additional single-point calculations on each optimized geometry using the def2-TZVP basis set<sup>19</sup>. For all calculations, the RIJCOSX approximation<sup>20-24</sup> was utilized with the auxiliary basis set def2/J<sup>25</sup>. To model the solution environment for acetone, the solvation model based on density (CPCM)<sup>26,27</sup> was utilized with parameters which have been implemented in ORCA. In the results reported, solvation calculations were carried out with the def2-SVP basis at the optimized gas-phase geometry employing the dielectric constants of  $\epsilon = 20.7$  for acetone, respectively. As is the case for all continuum models, the solvation energies are subject to empirical parametrization of the atomic radii that are used to generate the solute surface. We employed the standard set of optimized radii in ORCA for H (1.300 Å), C (2.000 Å), N (1.830 Å), O (1.720 Å), Fe (2.223 Å), Cl (2.050 Å). Analytical vibrational frequencies within the harmonic approximation were computed with the def2-SVP basis to confirm proper convergence to well-defined minima or saddle points on the potential energy surface. The energy components have been computed with the following protocol. The free energy in solution-phase,  $G(\text{sol})$ , has been calculated as follows:

$$G(\text{sol}) = G(\text{gas}) + G_{\text{solv}}$$

$$G(\text{gas}) = H(\text{gas}) - TS(\text{gas})$$

$$H(\text{gas}) = E(\text{SCF}) + \text{ZPE}$$

$$\Delta E(\text{SCF}) = \sum E(\text{SCF}) \text{ for products} - \sum E(\text{SCF}) \text{ for reactants}$$

$$\Delta G(\text{sol}) = \sum G(\text{sol}) \text{ for products} - \sum G(\text{sol}) \text{ for reactants}$$

**2. Complete active space self-consistent field (CASSCF).** To make our computations tractable, DFT optimized structures were used for multiconfigurational calculations. For better convergence, active orbitals for multiconfigurational calculations are derived from unrestricted

natural orbitals. All CASSCF results were calculated using def2-TZVP basis on all atoms along with CPCM correction. The choice of the active space is the most critical decision in any CASSCF study. A general series of rules for how to choose appropriate active space for a transition-metal complex has been established elsewhere<sup>28,29</sup> and was generally followed here. Thus, all five d-orbitals and important ligand-based orbitals (e.g. NO- $\pi^*$  orbitals) were included accordingly. Active space conservation of every single calculation was examined for proper convergence. To accelerate CASSCF calculations, we employed resolution of identity (RI) approximation with def2/J and def2-TZVP/C auxiliary basis sets.

**3. Excited state calculations.** To simulate excited states, state-averaged CASSCF (SA-CASSCF) calculations with 20 roots were computed with the pre-optimized ground state CAS wavefunction. Similar to the ground state calculations, the def2-TZVP basis on all atoms was used along with CPCM correction. With the optimized SA-CAS wavefunction, strongly contracted NEVPT2 (SC-NEVPT2) calculations were carried out accordingly in order to restore the dynamic correlation energy missing in CASSCF results. Electronic absorption spectra were simulated by the perturbed wave function and the simulated spectra were plotted with Gaussian broadening of 1000  $\text{cm}^{-1}$  width. The optimized active spaces were projected into natural orbital manifolds and the orbitals were plotted with Chimera software<sup>30</sup>.

**4. Geometry optimization with CASSCF level of theory.** Most quantum software that supports CASSCF calculations provides geometry optimization with numerical frequency calculations. As a result, while calculations for small molecules often converge quickly, those for larger molecules can take a significantly longer time. To accelerate the calculation process, we employed a new software BAGEL<sup>31</sup>, which supports analytic frequency calculations during the geometry optimization process. With the same active spaces that we selected from previous

sections, we performed the geometry optimization calculation to the first excited states of  $^4\mathbf{2}$ . As a result, as shown in the graph in the main text, we observed that the Fe complex and NO separate and stabilize. Notably, the calculation terminated before full convergence because a single wavefunction cannot represent the two dissociated molecules. This result is consistent with the prediction that NO will be released through excitation.

#### IV. Supplementary Figures

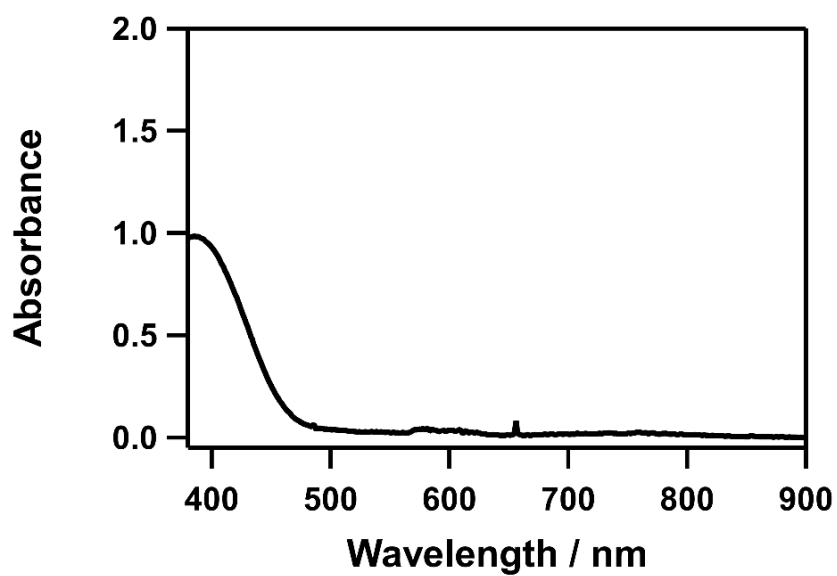

**Supplementary Figure S1.** UV-vis spectrum of [Fe<sup>II</sup>(Cl-TBDAP)(CH<sub>3</sub>CN)(OTf)]<sup>+</sup> (**1**) (2 mM) in acetone at -40 °C

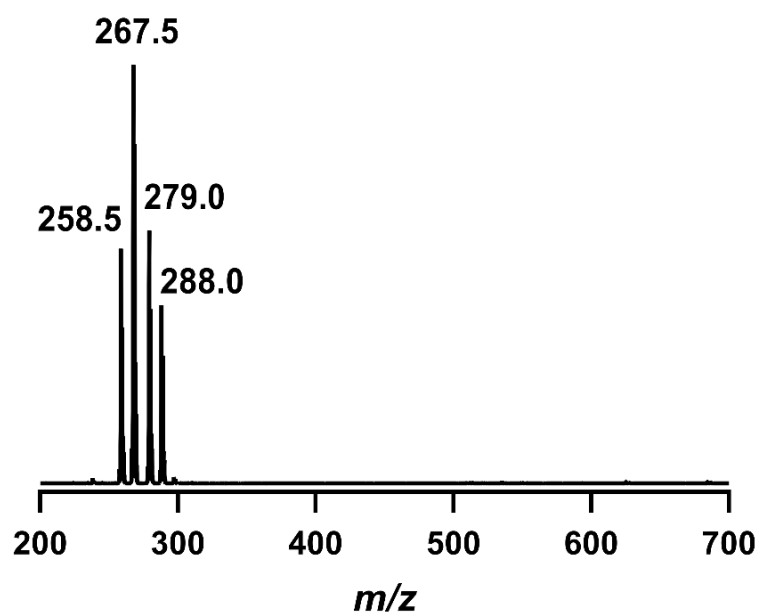

**Supplementary Figure S2.** ESI-MS spectrum of  $[\text{Fe}^{\text{II}}(\text{Cl-TBDAP})(\text{CH}_3\text{CN})(\text{OTf})]^+$  (**1**) in  $\text{CH}_3\text{CN}$ . Mass peaks at  $m/z = 258.8$ ,  $267.5$ ,  $279.0$ , and  $288.0$  are assigned to  $[\text{Fe}^{\text{II}}(\text{Cl-TBDAP})(\text{CH}_3\text{CN})]^{2+}$  (calcd.  $m/z = 258.6$ ),  $[\text{Fe}^{\text{II}}(\text{Cl-TBDAP})(\text{CH}_3\text{CN})(\text{H}_2\text{O})]^{2+}$  (calcd.  $m/z = 267.6$ ),  $[\text{Fe}^{\text{II}}(\text{Cl-TBDAP})(\text{CH}_3\text{CN})_2]^{2+}$  (calcd.  $m/z = 279.1$ ) and  $[\text{Fe}^{\text{II}}(\text{Cl-TBDAP})(\text{CH}_3\text{CN})_2(\text{H}_2\text{O})]^{2+}$  (calcd.  $m/z = 288.1$ ), respectively.

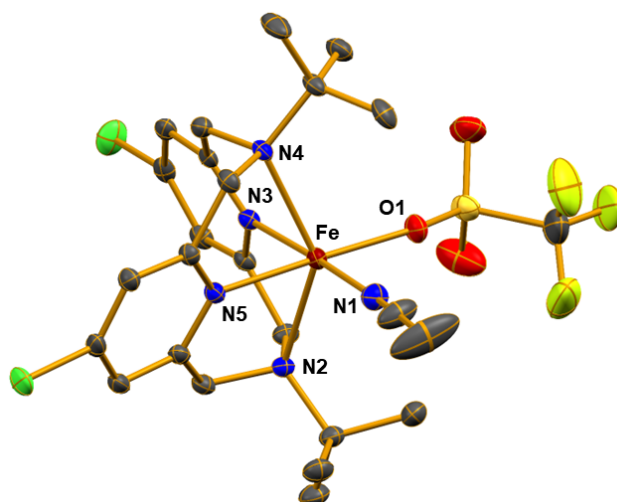

**Supplementary Figure S3.** ORTEP diagram of  $[\text{Fe}^{\text{II}}(\text{Cl-TBDAP})(\text{CH}_3\text{CN})(\text{OTf})]^+$  (**1**) with thermal ellipsoids drawn at the 30% probability level. Hydrogen atoms are omitted for clarity. Fe, scarlet; O, red; N, blue; C, dark gray; Cl, green; F, yellowish green; S, yellow.

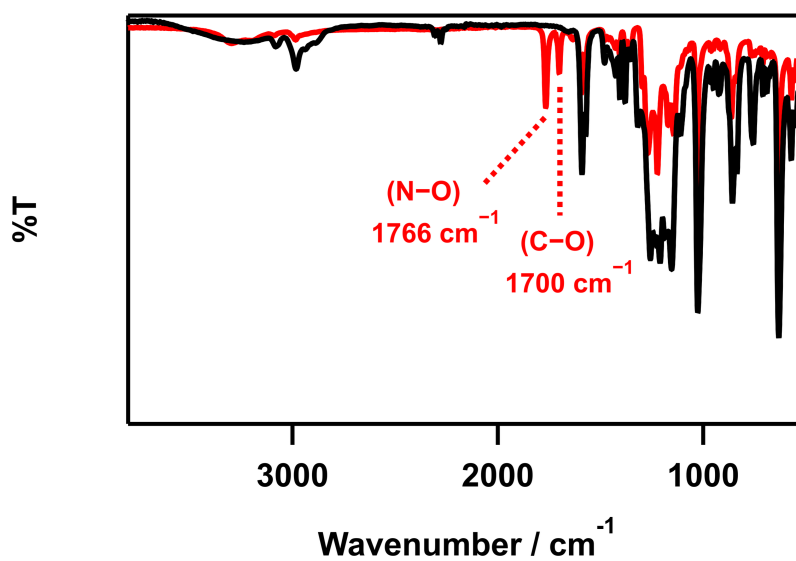

**Supplementary Figure S4.** The full range of solid state ATR-IR spectra for  $[\text{Fe}^{\text{II}}(\text{Cl-TBDAP})(\text{CH}_3\text{CN})(\text{OTf})]^+$  (**1**) (black) and  $[\text{Fe}(\text{Cl-TBDAP})(\text{NO})(\text{H}_2\text{O})]^{2+}$  (**2**) (red). The vibration energy of N–O in **2** was determined to be  $1766\text{ cm}^{-1}$ . The C–O vibration energy of  $1700\text{ cm}^{-1}$  originates from an acetone solvent molecule that is co-crystallized within the crystal lattice.

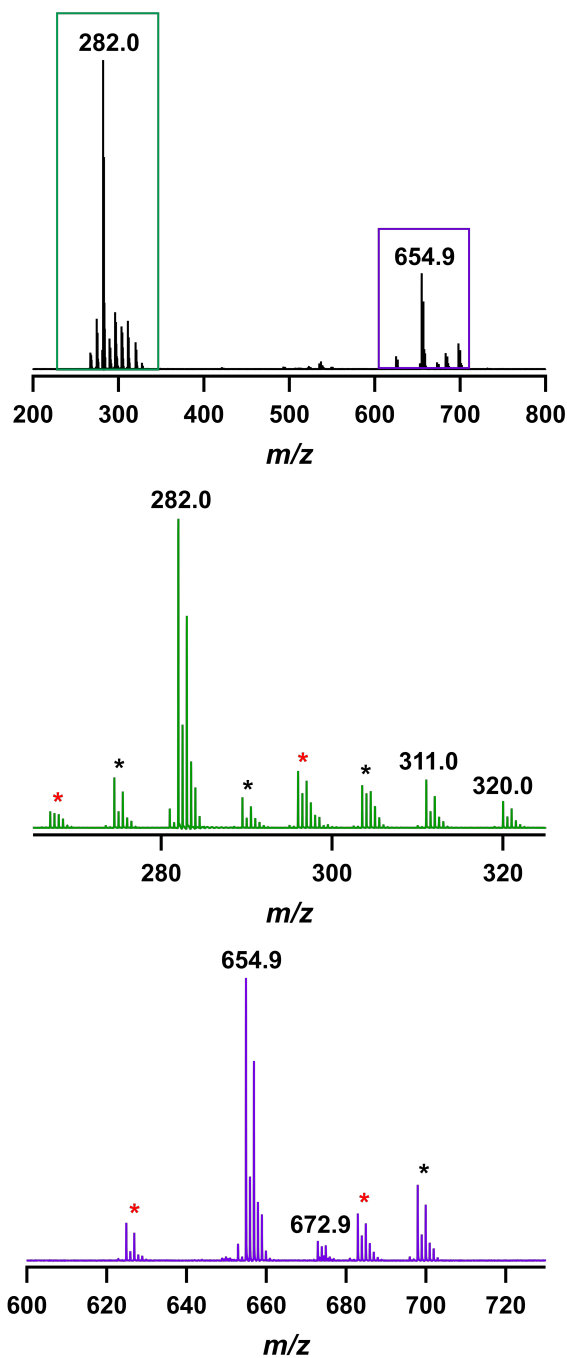

**Supplementary Figure S5.** CSI-MS spectrum of  $[\text{Fe}(\text{Cl-TBDAP})(\text{NO})(\text{H}_2\text{O})]^{2+}$  (**2**) in acetone at  $-30\text{ }^\circ\text{C}$ . Mass peaks at  $m/z = 282.0$ ,  $311.0$ ,  $320.0$ ,  $654.9$ , and  $672.9$  are assigned to  $[\text{Fe}(\text{Cl-TBDAP})(\text{NO})(\text{CH}_3\text{COCH}_3)]^{2+}$  (calcd.  $m/z = 282.1$ ),  $[\text{Fe}(\text{Cl-TBDAP})(\text{NO})(\text{CH}_3\text{COCH}_3)_2]^{2+}$  (calcd.  $m/z = 311.1$ ),  $[\text{Fe}(\text{Cl-TBDAP})(\text{NO})(\text{H}_2\text{O})(\text{CH}_3\text{COCH}_3)_2]^{2+}$  (calcd.  $m/z = 320.1$ ),  $[\text{Fe}(\text{Cl-TBDAP})(\text{NO})(\text{OTf})]^+$  (calcd.  $m/z = 655.1$ ) and  $[\text{Fe}(\text{Cl-TBDAP})(\text{NO})(\text{OTf})(\text{CH}_3\text{COCH}_3)]^+$  (calcd.  $m/z = 673.1$ ), respectively. Asterisk (\*) marks are some unidentified species (black) and Fe(II) species (red) due to thermal instability.

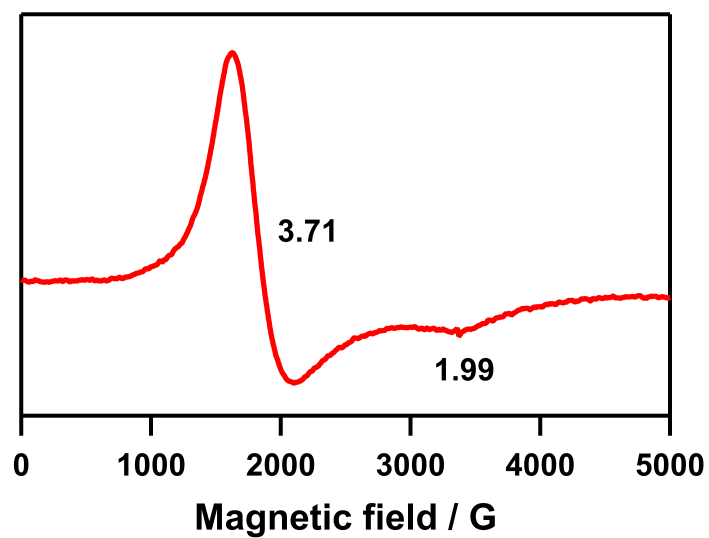

**Supplementary Figure S6.** X-band EPR spectrum of  $[\text{Fe}^{\text{II}}(\text{Cl-TBDAP})(\text{NO})(\text{H}_2\text{O})]^{2+}$  (**2**) (8 mM) in frozen acetone at 100 K. Spectroscopic settings: frequency = 9.422 GHz, microwave power = 1.002 mW, modulation frequency = 100 kHz, and modulation amplitude = 5 G.

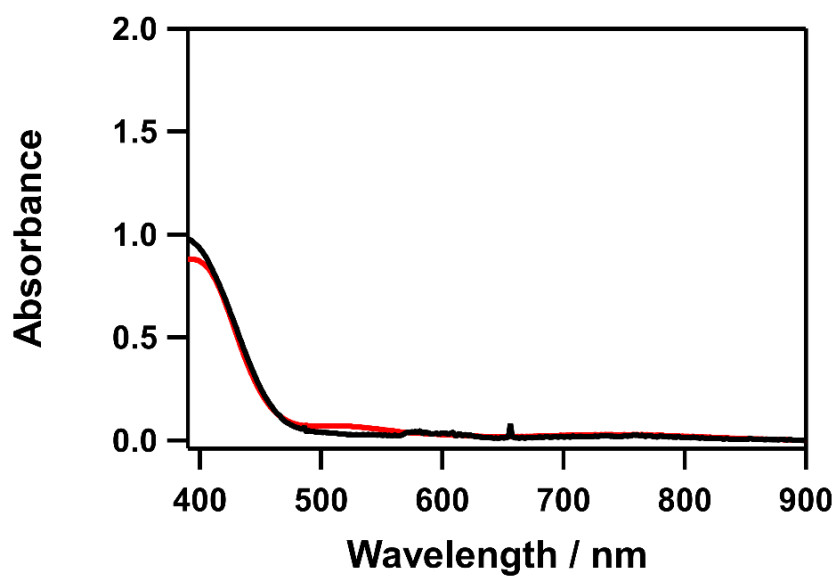

**Supplementary Figure S7.** Comparison of UV-vis spectrum between  $[\text{Fe}^{\text{II}}(\text{Cl-TBDAP})(\text{CH}_3\text{CN})(\text{OTf})]^+$  (**1**) (black) and  $[\text{Fe}(\text{Cl-TBDAP})(\text{NO})(\text{H}_2\text{O})]^{2+}$  (**2**) (red) after photolysis in acetone at  $-40\text{ }^\circ\text{C}$ .

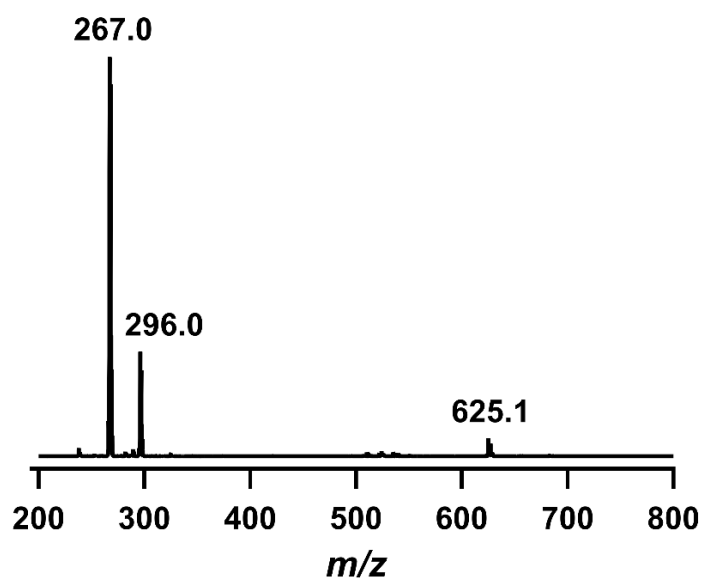

**Supplementary Figure S8.** ESI-MS spectrum of  $[\text{Fe}(\text{Cl-TBDAP})(\text{NO})(\text{H}_2\text{O})]^{2+}$  (**2**) in acetone after photolysis. Mass peaks at  $m/z = 267.0$ ,  $296.0$  and  $625.1$  are assigned to  $[\text{Fe}^{\text{II}}(\text{Cl-TBDAP})(\text{CH}_3\text{COCH}_3)]^{2+}$  (calcd.  $m/z = 267.1$ ),  $[\text{Fe}^{\text{II}}(\text{Cl-TBDAP})(\text{CH}_3\text{COCH}_3)_2]^{2+}$  (calcd.  $m/z = 296.1$ ) and  $[\text{Fe}^{\text{II}}(\text{Cl-TBDAP})(\text{OTf})]^+$  (calcd.  $m/z = 625.1$ ), respectively.

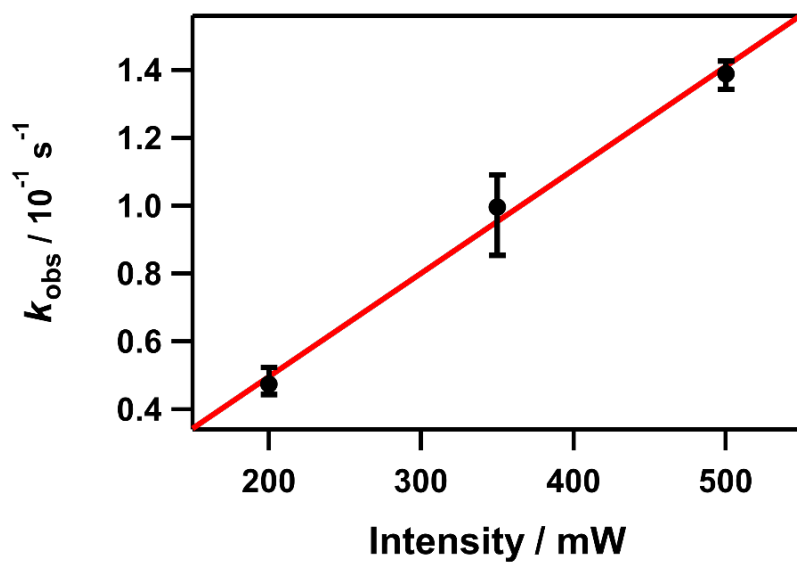

**Supplementary Figure S9.** Plot of photodissociation rate constants ( $k_{\text{obs}}$ ) of  $[\text{Fe}(\text{Cl-TBDAP})(\text{NO})(\text{H}_2\text{O})]^{2+}$  (**2**) against the intensity of xenon lamp.

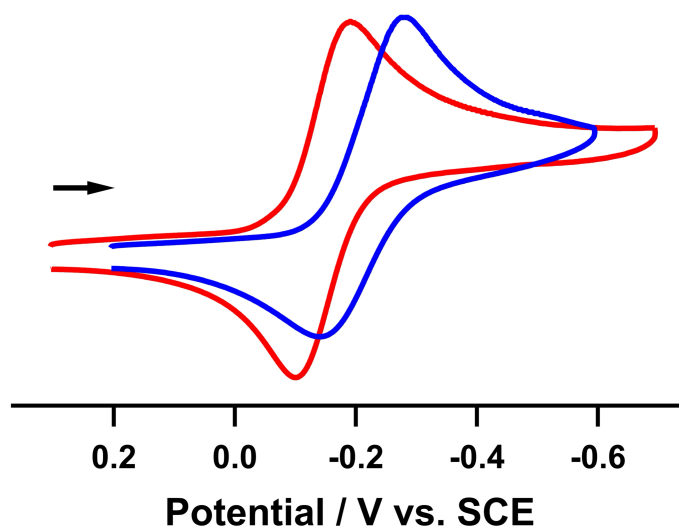

**Supplementary Figure S10.** Cyclic voltammograms of **2** (red) and  $[\text{Fe}(\text{TBDAP})(\text{NO})(\text{H}_2\text{O})]^{2+}$  (blue) in acetone (1 mM) containing 0.1 M  $\text{Bu}_4\text{NPF}_6$  at  $-50\text{ }^\circ\text{C}$  (working electrode, Pt; counter electrode, Pt; reference electrode,  $\text{Ag}/\text{Ag}^+$ ; scan rate =  $200\text{ mV s}^{-1}$ ). Redox potential ( $E_{1/2}$ ) of **2** and  $[\text{Fe}(\text{TBDAP})(\text{NO})(\text{H}_2\text{O})]^{2+}$  are determined to be  $-0.15$  and  $-0.21$  V, respectively. A higher redox potential of **2** was achieved by substitution of the H group with an electron-withdrawing Cl group, resulting in an electron-deficient environment for the Fe center.

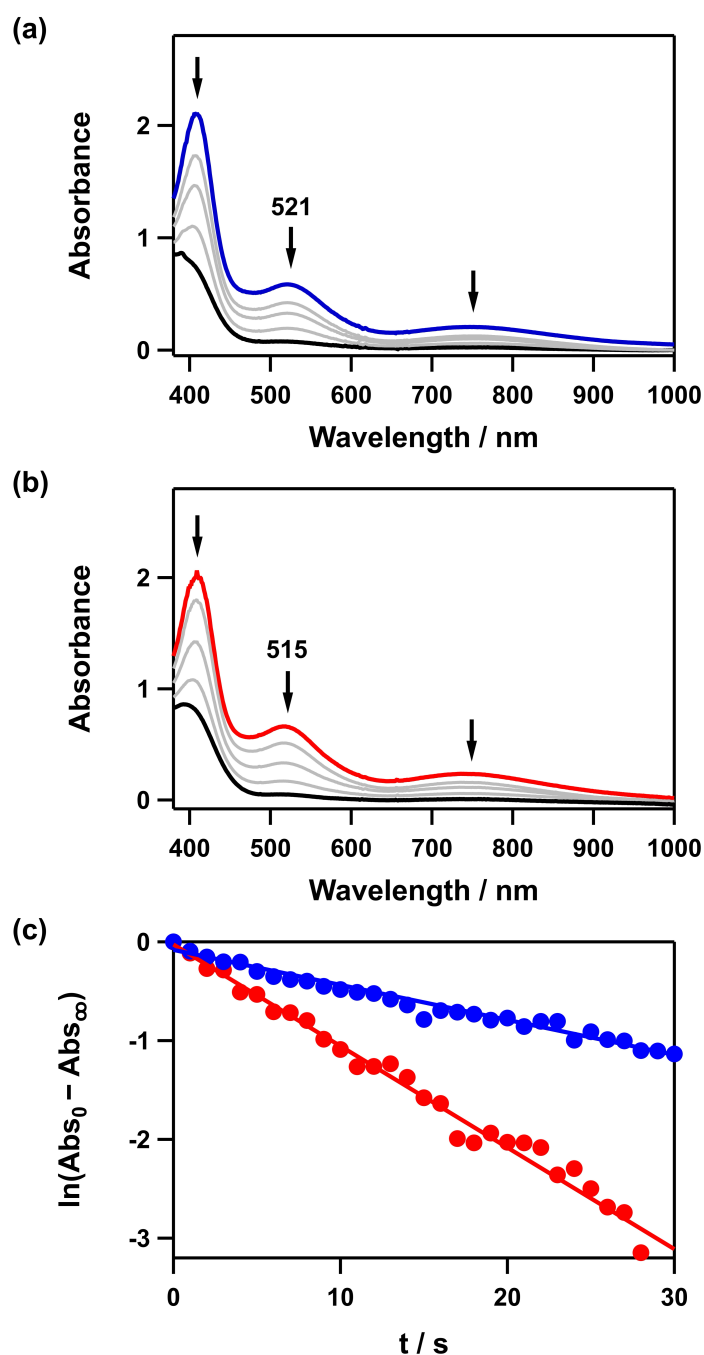

**Supplementary Figure S11.** UV-vis spectral changes observed in the photolysis reaction of (a)  $[\text{Fe}(\text{TBDAP})(\text{NO})(\text{H}_2\text{O})]^{2+}$  and (b)  $[\text{Fe}(\text{Cl-TBDAP})(\text{NO})(\text{H}_2\text{O})]^{2+}$  (**2**) in acetone at  $-40^\circ\text{C}$  under white light ( $\lambda_{\text{irr}} = 385\text{-}740\text{ nm}$ , 500 mW, xenon lamp). (c) First-order plots of  $[\text{Fe}(\text{TBDAP})(\text{NO})(\text{H}_2\text{O})]^{2+}$  (blue) and **2** (red). Rate constants ( $k_{\text{obs}}$ ) of  $[\text{Fe}(\text{TBDAP})(\text{NO})(\text{H}_2\text{O})]^{2+}$  and **2** were determined to be  $3.37 \times 10^{-2}\text{ s}^{-1}$  and  $1.06 \times 10^{-1}\text{ s}^{-1}$ , respectively.

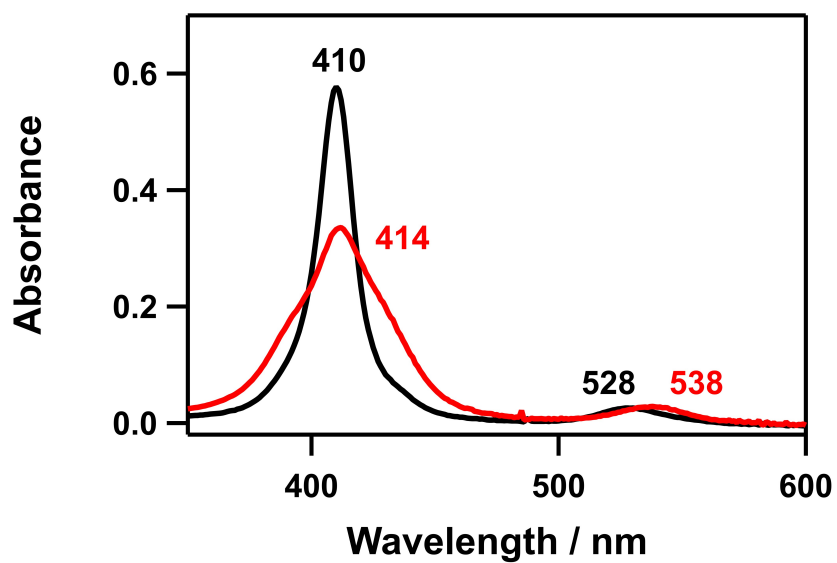

**Supplementary Figure S12.** Spectral evidence for NO<sup>•</sup> transfer from [Fe(Cl-TBDAP)(NO)(H<sub>2</sub>O)]<sup>2+</sup> (**2**) in acetone to [Co(TPP)] in CH<sub>2</sub>Cl<sub>2</sub>. Electronic absorption spectra of [Co(TPP)] (black) shift to [Co(NO)(TPP)] (red) after 30 min photoirradiation<sup>32</sup>. The detection of NO<sup>•</sup> was performed in an H-shaped Schlenk tube.

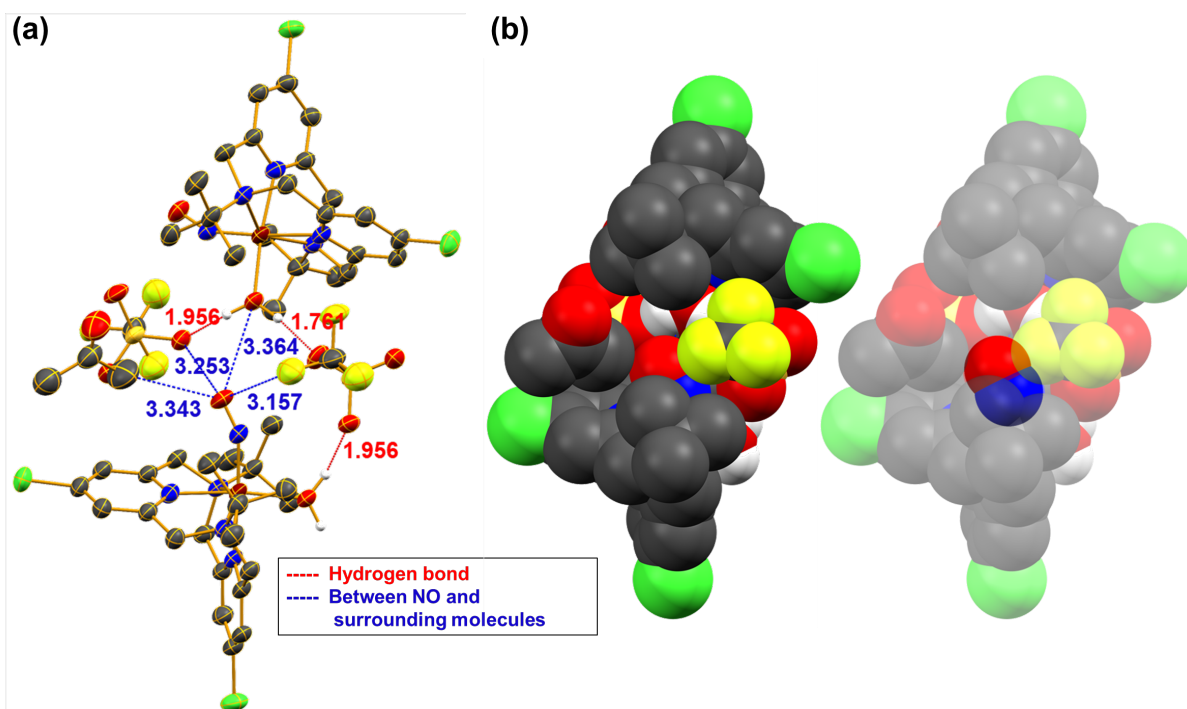

**Supplementary Figure S13.** Structural encumbrance around the NO moiety. ORTEP diagram with thermal ellipsoids drawn at the 30% probability level. Hydrogen atoms are omitted for clarity except for water. Fe, scarlet; O, red; N, blue; C, dark gray; Cl, green; F, yellowish green; S, yellow. (a) The hydrogen bonding interactions between triflate (OTf<sup>-</sup>) and the H<sub>2</sub>O ligand are represented (red dotted line). The distances between surrounding molecules and the NO ligand are illustrated (blue dotted line). (b) A space-filling representation around the NO ligand (left) and transparent depiction (right).

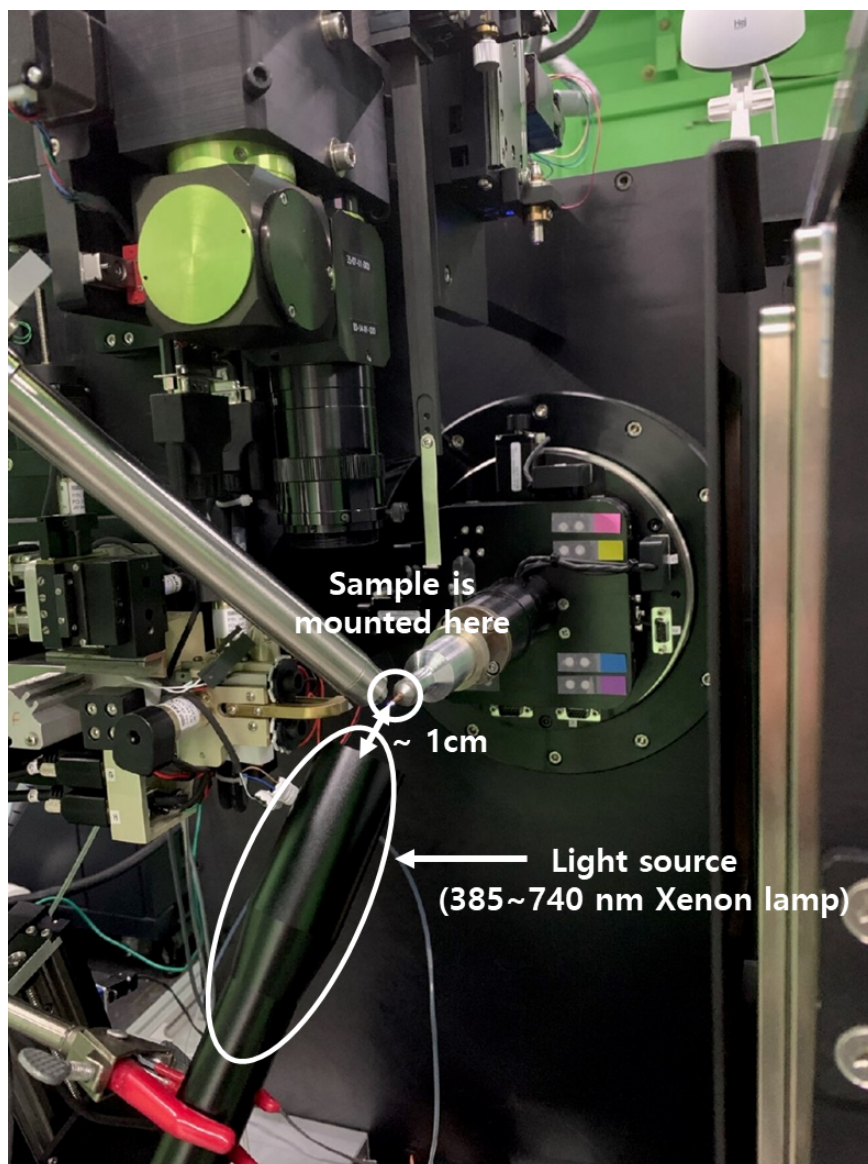

**Supplementary Figure S14.** Instrumental setup for synchronous in-situ single crystal photocrystallography. The xenon lamp was positioned ~1 cm beneath the goniometer of default equipment for diffraction in the beamline. Before turning on the light, the single crystal of **2** was mounted on the goniometer, then the X-ray structure of pristine was obtained. After measurement of the pristine structure, serial data collections every 130 seconds of the diffraction pattern of samples were carried out under continuous irradiation from a xenon lamp.

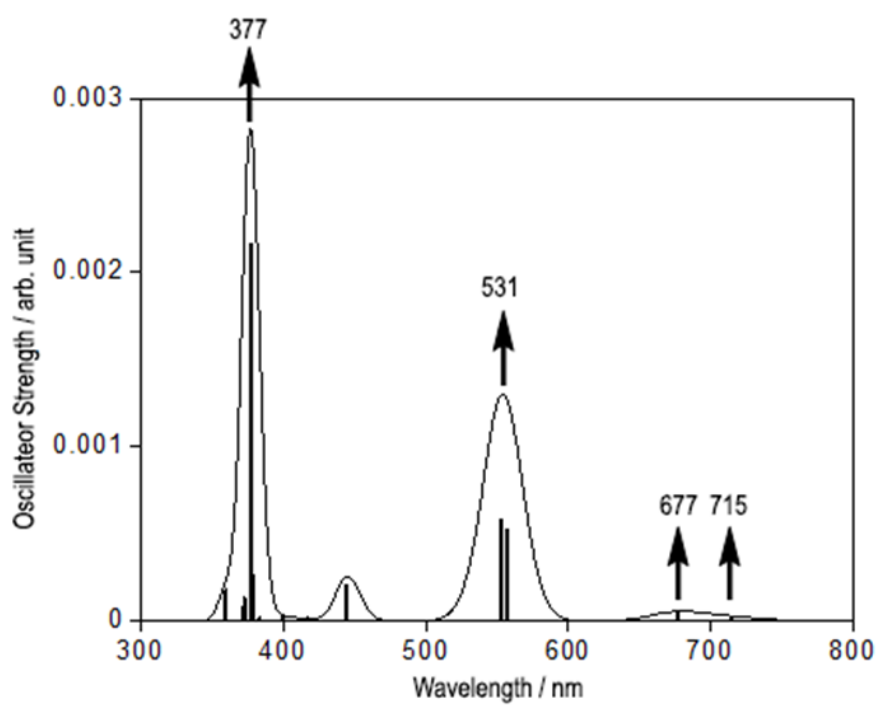

**Supplementary Figure S15.** NEVPT2/SA-CASSCF(11,9)/def2-TZVP-computed absorption spectrum of **2**.

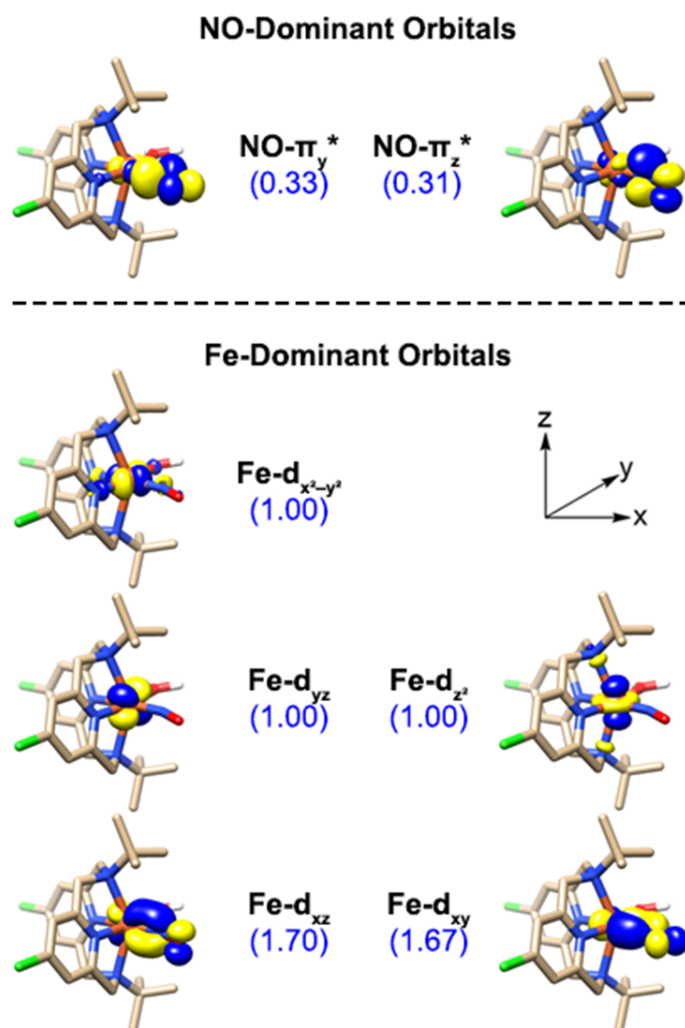

**Supplementary Figure S16.** NEVPT2/CASSCF(11,9)-computed configurations of 42 projected into natural orbital manifolds. Hydrogen atoms are omitted for clarity and isovalue of 0.05 a.u. is used. The identical electron density represented in Fig. 4 were projected to the natural orbital for analyzing the bonding nature of Fe–NO complex.

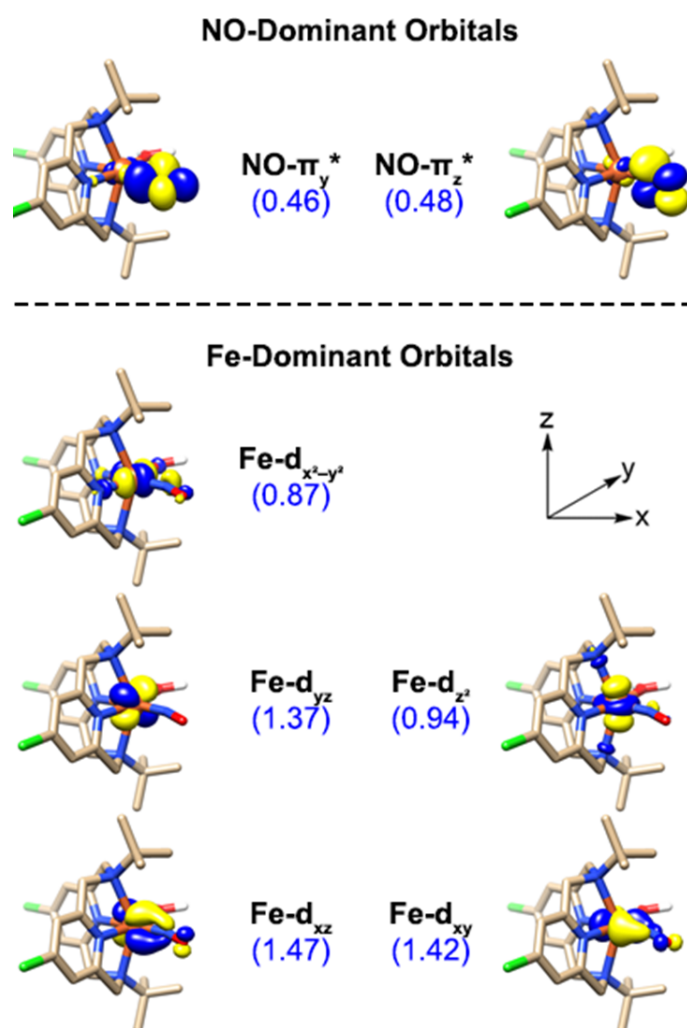

**Supplementary Figure S17.** NEVPT2/SA-CASSCF(11,9)-computed configurations of 42 with 20 excited states projected into natural orbital manifolds. Hydrogen atoms are omitted for clarity and isovalue of 0.05 a.u. is used. Compared to electron density represented from Supplementary Figure S17, the electron density on the Fe-dominant orbital moved to the NO-dominant orbital, while considering the excited state. This implies that through these transitions, the electron density moved from the Fe–NO bonding orbitals to Fe–NO antibonding orbitals.

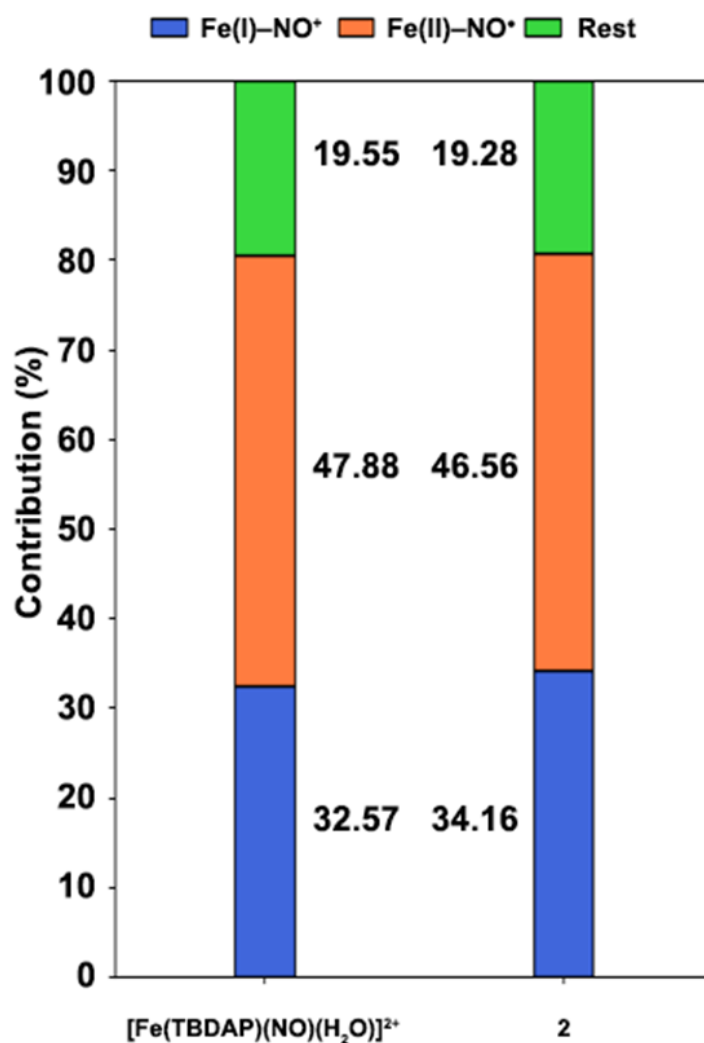

**Supplementary Figure S18.** The bar graphs highlight the Fe<sup>I</sup>-NO<sup>+</sup> configuration percentage of  $[\text{Fe}(\text{TBDAP})(\text{NO})(\text{H}_2\text{O})]^{2+}$  and **2** involved in reaching the MLCT state. The percentage of Fe<sup>I</sup>-NO<sup>+</sup> configuration in **2** is raised by the electron-withdrawing Cl group.

## V. Supplementary Tables

**Supplementary Table S1.** Crystal data and structural refinements for **1-(OTf)** and **2-(OTf)<sub>2</sub>·CH<sub>3</sub>COCH<sub>3</sub>**

|                                                         | <b>1-(OTf)</b>                                                                                                | <b>2-(OTf)<sub>2</sub>·CH<sub>3</sub>COCH<sub>3</sub></b>                                                     |
|---------------------------------------------------------|---------------------------------------------------------------------------------------------------------------|---------------------------------------------------------------------------------------------------------------|
| Empirical formula                                       | C <sub>26</sub> H <sub>33</sub> Cl <sub>2</sub> F <sub>6</sub> FeN <sub>5</sub> O <sub>6</sub> S <sub>2</sub> | C <sub>27</sub> H <sub>38</sub> Cl <sub>2</sub> F <sub>6</sub> FeN <sub>5</sub> O <sub>9</sub> S <sub>2</sub> |
| Formula weight                                          | 816.44                                                                                                        | 881.49                                                                                                        |
| Temperature / K                                         | 173(2)                                                                                                        | 235(2)                                                                                                        |
| Wavelength / Å                                          | 0.71073                                                                                                       | 0.700                                                                                                         |
| Crystal system/space group                              | Triclinic, <i>P</i> $\bar{1}$                                                                                 | Monoclinic, <i>P</i> 2 <sub>1</sub> / <i>c</i>                                                                |
| Unit cell dimensions                                    |                                                                                                               |                                                                                                               |
| <i>a</i> / Å                                            | 10.455(2)                                                                                                     | 16.573(3)                                                                                                     |
| <i>b</i> / Å                                            | 13.987(3)                                                                                                     | 11.195(2)                                                                                                     |
| <i>c</i> / Å                                            | 14.498(3)                                                                                                     | 20.950(4)                                                                                                     |
| $\alpha$ / °                                            | 87.76                                                                                                         | 90                                                                                                            |
| $\beta$ / °                                             | 76.06(3)                                                                                                      | 105.62(3)                                                                                                     |
| $\gamma$ / °                                            | 71.57(3)                                                                                                      | 90                                                                                                            |
| Volume / Å <sup>3</sup>                                 | 1950.6(8)                                                                                                     | 3743.4(14)                                                                                                    |
| <i>Z</i>                                                | 2                                                                                                             | 4                                                                                                             |
| Calculated density / g cm <sup>-3</sup>                 | 1.390                                                                                                         | 1.564                                                                                                         |
| Absorption coefficient / mm <sup>-1</sup>               | 0.700                                                                                                         | 0.705                                                                                                         |
| Reflections collected                                   | 15359                                                                                                         | 25081                                                                                                         |
| Independent reflections<br>[ <i>R</i> (int)]            | 6862<br>[0.0147]                                                                                              | 6848<br>[0.0729]                                                                                              |
| Refinement method                                       | Full-matrix least-squares on <i>F</i> <sup>2</sup>                                                            | Full-matrix least-squares on <i>F</i> <sup>2</sup>                                                            |
| Data/restraints/parameters                              | 6862 / 0 / 440                                                                                                | 6848 / 408 / 548                                                                                              |
| Goodness-of-fit on <i>F</i> <sup>2</sup>                | 1.025                                                                                                         | 1.099                                                                                                         |
| Final <i>R</i> indices [ <i>I</i> > 2sigma( <i>I</i> )] | R <sub>1</sub> = 0.0420, wR <sub>2</sub> = 0.1042                                                             | R <sub>1</sub> = 0.0691, wR <sub>2</sub> = 0.2132                                                             |
| <i>R</i> indices (all data)                             | R <sub>1</sub> = 0.0480, wR <sub>2</sub> = 0.1080                                                             | R <sub>1</sub> = 0.0922, wR <sub>2</sub> = 0.2285                                                             |

**Supplementary Table S2.** Selected bond distances (Å) and angles (°) for **1-(OTf)** and **2-(OTf)<sub>2</sub>·CH<sub>3</sub>COCH<sub>3</sub>**

| <b>Bond distances / Å</b> |                |            |                                                           |          |
|---------------------------|----------------|------------|-----------------------------------------------------------|----------|
|                           | <b>1-(OTf)</b> |            | <b>2-(OTf)<sub>2</sub>·CH<sub>3</sub>COCH<sub>3</sub></b> |          |
| Fe–N1                     |                | 2.125(2)   | Fe–N1                                                     | 1.762(4) |
| Fe–N2                     |                | 2.390(2)   | Fe–N2                                                     | 2.307(4) |
| Fe–N3                     |                | 2.087(2)   | Fe–N3                                                     | 2.067(4) |
| Fe–N4                     |                | 2.357(2)   | Fe–N4                                                     | 2.309(4) |
| Fe–N5                     |                | 2.109(2)   | Fe–N5                                                     | 2.043(4) |
| Fe–O1                     |                | 2.0602(19) | Fe–O2                                                     | 2.062(3) |
|                           |                |            | N1–O1                                                     | 1.157(4) |

  

| <b>Bond angles / °</b> |                |           |                                                           |            |
|------------------------|----------------|-----------|-----------------------------------------------------------|------------|
|                        | <b>1-(OTf)</b> |           | <b>2-(OTf)<sub>2</sub>·CH<sub>3</sub>COCH<sub>3</sub></b> |            |
| N1–Fe–N2               |                | 106.80(9) | N1–Fe–N2                                                  | 97.57(16)  |
| N1–Fe–N3               |                | 173.43(9) | N1–Fe–N3                                                  | 175.28(15) |
| N1–Fe–N4               |                | 98.11(9)  | N1–Fe–N4                                                  | 107.44(16) |
| N1–Fe–N5               |                | 90.02(9)  | N1–Fe–N5                                                  | 91.83(16)  |
| N1–Fe–O1               |                | 90.86(9)  | N1–Fe–O2                                                  | 94.99(15)  |
| N2–Fe–N3               |                | 74.46(8)  | N2–Fe–N3                                                  | 78.33(14)  |
| N2–Fe–N4               |                | 140.48(7) | N2–Fe–N4                                                  | 144.23(14) |
| N2–Fe–N5               |                | 76.06(8)  | N2–Fe–N5                                                  | 74.75(14)  |
| N2–Fe–O1               |                | 101.51(8) | N2–Fe–O2                                                  | 104.82(13) |
| N3–Fe–N4               |                | 77.61(8)  | N3–Fe–N4                                                  | 75.29(14)  |
| N3–Fe–N5               |                | 84.01(8)  | N3–Fe–N5                                                  | 84.87(14)  |
| N3–Fe–O1               |                | 95.21(8)  | N3–Fe–O2                                                  | 88.36(13)  |
| N4–Fe–N5               |                | 73.72(8)  | N4–Fe–N5                                                  | 79.19(14)  |
| N4–Fe–O1               |                | 108.39(8) | N4–Fe–O2                                                  | 98.18(13)  |
| N5–Fe–O1               |                | 177.57(8) | N5–Fe–O2                                                  | 173.16(14) |
|                        |                |           | Fe–N1–O2                                                  | 152.8(4)   |

**Supplementary Table S3.** Bond distance (Å) and angle (°) changes of **2-(OTf)<sub>2</sub>·CH<sub>3</sub>COCH<sub>3</sub>** against exposure time of visible light ( $\lambda_{\text{irr}} = 385\text{--}740$  nm).

| Time (s) | Fe–N1 (Å) | N1–O1 (Å) | Fe–N1–O1 (°) |
|----------|-----------|-----------|--------------|
| Pristine | 1.762(4)  | 1.157(4)  | 152.8(4)     |
| 130      | 1.762(4)  | 1.156(4)  | 152.3(4)     |
| 260      | 1.763(4)  | 1.156(5)  | 152.6(4)     |
| 390      | 1.764(4)  | 1.151(5)  | 152.5(4)     |
| 520      | 1.766(4)  | 1.152(5)  | 152.7(4)     |
| 650      | 1.769(4)  | 1.148(5)  | 152.5(4)     |
| 780      | 1.772(4)  | 1.146(5)  | 152.4(4)     |
| 910      | 1.771(4)  | 1.145(5)  | 152.6(4)     |
| 1040     | 1.772(4)  | 1.147(5)  | 152.2(4)     |
| 1170     | 1.775(4)  | 1.140(5)  | 152.4(4)     |
| 1300     | 1.777(4)  | 1.136(5)  | 151.8(4)     |
| 1430     | 1.779(4)  | 1.137(5)  | 152.2(4)     |
| 1560     | 1.784(4)  | 1.132(5)  | 152.1(4)     |
| 1690     | 1.782(5)  | 1.136(5)  | 152.0(4)     |
| 1820     | 1.780(5)  | 1.133(5)  | 152.0(5)     |
| 1950     | 1.783(5)  | 1.127(5)  | 152.3(5)     |
| 2080     | 1.786(5)  | 1.128(5)  | 152.1(5)     |
| 2210     | 1.782(5)  | 1.132(5)  | 151.8(5)     |
| 2340     | 1.789(5)  | 1.126(6)  | 151.6(5)     |
| 2470     | 1.784(5)  | 1.126(6)  | 151.9(5)     |
| 2600     | 1.792(5)  | 1.117(6)  | 152.0(5)     |
| 2730     | 1.792(5)  | 1.121(6)  | 151.7(5)     |
| 2860     | 1.793(5)  | 1.118(6)  | 151.9(5)     |
| 2990     | 1.796(6)  | 1.119(6)  | 150.9(5)     |
| 3120     | 1.795(6)  | 1.119(6)  | 151.0(6)     |
| 3250     | 1.796(6)  | 1.110(6)  | 151.5(6)     |

| Time (s) | Fe-N1 (Å) | N1-O1 (Å) | Fe-N1-O1 (°) |
|----------|-----------|-----------|--------------|
| 3380     | 1.798(6)  | 1.110(6)  | 151.6(6)     |
| 3510     | 1.794(6)  | 1.115(6)  | 150.8(6)     |
| 3640     | 1.802(6)  | 1.115(6)  | 150.9(6)     |
| 3770     | 1.801(6)  | 1.113(7)  | 150.4(6)     |
| 3900     | 1.796(7)  | 1.113(7)  | 150.8(6)     |
| 4030     | 1.800(7)  | 1.113(7)  | 151.1(6)     |
| 4160     | 1.792(7)  | 1.115(7)  | 151.1(7)     |
| 4290     | 1.799(7)  | 1.110(7)  | 151.1(7)     |
| 4420     | 1.800(7)  | 1.110(7)  | 151.5(7)     |
| 4550     | 1.798(7)  | 1.110(7)  | 150.9(7)     |
| 4680     | 1.792(7)  | 1.112(7)  | 151.8(7)     |
| 4810     | 1.805(7)  | 1.104(7)  | 151.2(7)     |
| 4940     | 1.801(8)  | 1.110(7)  | 151.0(7)     |
| 5070     | 1.810(8)  | 1.106(7)  | 150.3(7)     |
| 5200     | 1.800(8)  | 1.110(8)  | 151.5(8)     |
| 5330     | 1.801(8)  | 1.103(8)  | 151.7(8)     |
| 5460     | 1.802(9)  | 1.102(8)  | 151.2(8)     |
| 5590     | 1.806(9)  | 1.109(8)  | 151.1(8)     |
| 5720     | 1.803(9)  | 1.104(8)  | 151.2(8)     |
| 5850     | 1.802(9)  | 1.117(8)  | 150.1(9)     |
| 5980     | 1.801(9)  | 1.104(8)  | 150.6(9)     |
| 6110     | 1.803(9)  | 1.104(8)  | 151.2(9)     |
| 6240     | 1.793(9)  | 1.107(8)  | 151.5(9)     |
| 6370     | 1.808(10) | 1.107(9)  | 150.1(10)    |
| 6500     | 1.805(10) | 1.103(9)  | 150.9(10)    |

**Supplementary Table S4.** Experimentally determined bond lengths (in Å) and angles (in Degrees) for **2** along with calculated values.

|                                   | Exp.     | <sup>2</sup> <b>2</b> (Calc.) | <sup>4</sup> <b>2</b> (Calc.) | <sup>6</sup> <b>2</b> (Calc.) |
|-----------------------------------|----------|-------------------------------|-------------------------------|-------------------------------|
| Fe–NO (Å)                         | 1.762(4) | 1.775                         | 1.785                         | 2.099                         |
| N–O (Å)                           | 1.157(4) | 1.161                         | 1.154                         | 1.153                         |
| Fe–N–O (°)                        | 152.8(4) | 145.22                        | 163.84                        | 155.38                        |
| $\Delta G(\text{sol})$ (kcal/mol) | –        |                               | 0.00                          | 13.89                         |

**Supplementary Table S5.** CASSCF(11,9)-computed configurations of **42** projected into a Foster-Boys localized orbital.

|                  | <b>Electronic configuration</b>                                                                                                                                     | <b>Weight</b> |
|------------------|---------------------------------------------------------------------------------------------------------------------------------------------------------------------|---------------|
| $ \Phi_1\rangle$ | $ (Fe-d_{x^2-y^2})^\uparrow(Fe-d_{xy})^\uparrow(Fe-d_z)^{\uparrow}(Fe-d_{yz})^\uparrow(Fe-d_{xz})^\uparrow(NO-\pi^*_y)^\downarrow(NO-\pi^*_z)^\downarrow\rangle$    | 44.6          |
| $ \Phi_2\rangle$ | $ (Fe-d_{x^2-y^2})^\uparrow(Fe-d_{xy})^\uparrow(Fe-d_z)^{\uparrow}(Fe-d_{yz})^\uparrow(Fe-d_{xz})^{\uparrow\downarrow}(NO-\pi^*_y)^\downarrow(NO-\pi^*_z)^0\rangle$ | 15.3          |
| $ \Phi_3\rangle$ | $ (Fe-d_{x^2-y^2})^\uparrow(Fe-d_{xy})^{\uparrow\downarrow}(Fe-d_z)^{\uparrow}(Fe-d_{yz})^\uparrow(Fe-d_{xz})^\uparrow(NO-\pi^*_y)^0(NO-\pi^*_z)^\downarrow\rangle$ | 12.9          |

**Supplementary Table S6.** NEVPT2/SA-CASSCF(11,9)-computed configurations of  $^4\mathbf{2}$  projected into natural orbital manifolds. Most important excited states are enumerated. Configurations more than 15% are given below.

| State                 | Excitation Energy (eV / nm) | Oscillator Strength (arb. unit) | Weight | Electronic configuration                                                     | Character              |
|-----------------------|-----------------------------|---------------------------------|--------|------------------------------------------------------------------------------|------------------------|
| <b>Q<sub>0</sub></b>  |                             |                                 | 34.16  | $(d_{xz})^2(d_{xy})^2(d_{yz})^1(d_z)^1(d_{x^2-y^2})^1(\pi^*_y)^0(\pi^*_z)^0$ | Fe(I)–NO <sup>+</sup>  |
|                       |                             |                                 | 23.46  | $(d_{xz})^2(d_{xy})^1(d_{yz})^1(d_z)^1(d_{x^2-y^2})^1(\pi^*_y)^1(\pi^*_z)^0$ | Fe(II)–NO <sup>•</sup> |
|                       |                             |                                 | 23.10  | $(d_{xz})^1(d_{xy})^2(d_{yz})^1(d_z)^1(d_{x^2-y^2})^1(\pi^*_y)^0(\pi^*_z)^1$ | Fe(II)–NO <sup>•</sup> |
| <b>Q<sub>1</sub></b>  | 1.734 / 715                 | $1.799 \times 10^{-5}$          | 48.24  | $(d_{xz})^1(d_{xy})^1(d_{yz})^2(d_z)^1(d_{x^2-y^2})^1(\pi^*_y)^0(\pi^*_z)^1$ | Fe(II)–NO <sup>•</sup> |
|                       |                             |                                 | 25.52  | $(d_{xz})^2(d_{xy})^1(d_{yz})^2(d_z)^1(d_{x^2-y^2})^1(\pi^*_y)^0(\pi^*_z)^0$ | Fe(I)–NO <sup>+</sup>  |
| <b>Q<sub>2</sub></b>  | 1.832 / 677                 | $4.811 \times 10^{-5}$          | 51.16  | $(d_{xz})^1(d_{xy})^1(d_{yz})^2(d_z)^1(d_{x^2-y^2})^1(\pi^*_y)^1(\pi^*_z)^0$ | Fe(II)–NO <sup>•</sup> |
|                       |                             |                                 | 22.28  | $(d_{xz})^1(d_{xy})^2(d_{yz})^2(d_z)^1(d_{x^2-y^2})^1(\pi^*_y)^0(\pi^*_z)^0$ | Fe(I)–NO <sup>+</sup>  |
| <b>Q<sub>8</sub></b>  | 2.229 / 556                 | $5.234 \times 10^{-4}$          | 34.19  | $(d_{xz})^2(d_{xy})^2(d_{yz})^1(d_z)^1(d_{x^2-y^2})^0(\pi^*_y)^1(\pi^*_z)^0$ | Fe(II)–NO <sup>•</sup> |
|                       |                             |                                 | 28.50  | $(d_{xz})^2(d_{xy})^2(d_{yz})^1(d_z)^1(d_{x^2-y^2})^0(\pi^*_y)^0(\pi^*_z)^1$ |                        |
| <b>Q<sub>9</sub></b>  | 2.244 / 553                 | $5.755 \times 10^{-4}$          | 34.93  | $(d_{xz})^2(d_{xy})^2(d_{yz})^1(d_z)^1(d_{x^2-y^2})^0(\pi^*_y)^0(\pi^*_z)^1$ | Fe(II)–NO <sup>•</sup> |
|                       |                             |                                 | 29.31  | $(d_{xz})^2(d_{xy})^2(d_{yz})^1(d_z)^1(d_{x^2-y^2})^0(\pi^*_y)^1(\pi^*_z)^0$ |                        |
| <b>Q<sub>10</sub></b> | 3.290 / 377                 | $2.160 \times 10^{-3}$          | 53.61  | $(d_{xz})^1(d_{xy})^1(d_{yz})^1(d_z)^1(d_{x^2-y^2})^2(\pi^*_y)^0(\pi^*_z)^1$ | Fe(II)–NO <sup>•</sup> |
|                       |                             |                                 | 17.02  | $(d_{xz})^2(d_{xy})^1(d_{yz})^1(d_z)^1(d_{x^2-y^2})^2(\pi^*_y)^0(\pi^*_z)^0$ | Fe(I)–NO <sup>+</sup>  |

**Supplementary Table S7.** Computed energy components of the DFT-optimized structures.

|                      | <b>E(SCF)/(eV)</b><br>def2-TZVP | <b>ZPE/(kcal/mol)</b><br>def2-SVP | <b>S(gas)/(cal/mol·K)</b><br>def2-SVP | <b>G(solv)/(kcal/mol)</b><br>def2-SVP |
|----------------------|---------------------------------|-----------------------------------|---------------------------------------|---------------------------------------|
| <b><sup>2</sup>2</b> | -94292.140                      | 333.56                            | 188.43                                | -138.09                               |
| <b><sup>4</sup>2</b> | -94292.468                      | 330.24                            | 195.74                                | -139.32                               |
| <b><sup>6</sup>2</b> | -94291.721                      | 329.05                            | 202.08                                | -139.32                               |

**Supplementary Table S8.** Cartesian coordinates of the optimized geometries.

22

---

---

|    |                   |                   |                   |
|----|-------------------|-------------------|-------------------|
| Fe | 9.52514470024760  | 6.10019733789915  | 14.71121804321842 |
| Cl | 5.33746108831249  | 1.67226926865030  | 16.76270299415375 |
| Cl | 5.14313547734797  | 10.45169500927857 | 13.20842826484311 |
| O  | 11.01756763859266 | 8.37242127658472  | 14.00857662583086 |
| O  | 11.08070560488665 | 4.51577995212550  | 15.02009884112358 |
| H  | 11.28493938752951 | 4.15405788517167  | 15.89573381915987 |
| H  | 11.93521354543343 | 4.68239824631222  | 14.59166448678459 |
| N  | 10.78118421741110 | 7.25638427552768  | 14.22451734290385 |
| N  | 9.10914805635423  | 6.94228081131660  | 16.73911852148537 |
| N  | 8.20045638502264  | 4.76965316848922  | 15.34093286462522 |
| N  | 8.88492658181512  | 5.17690585939174  | 12.80429610705166 |
| N  | 8.14108805214031  | 7.35526276727345  | 14.30494747273902 |
| C  | 10.20596394141211 | 6.81192814361965  | 17.81758071767119 |
| C  | 11.56780573712638 | 7.18840724712345  | 17.22545939818074 |
| H  | 12.32753184767721 | 7.13175478925998  | 18.01793245320741 |
| H  | 11.59749365664554 | 8.21305807969931  | 16.83031730453632 |
| H  | 11.86477530332766 | 6.49435208270553  | 16.42932719120209 |
| C  | 9.90521865066638  | 7.72672153051025  | 19.01481822429484 |
| H  | 8.89613922659787  | 7.57353201556618  | 19.42843811323255 |
| H  | 10.02502932721904 | 8.79070906222468  | 18.76486140187627 |
| H  | 10.61598173593201 | 7.50534465829874  | 19.82375549341759 |
| C  | 10.26606962198949 | 5.35063280504164  | 18.28886409779818 |
| H  | 11.17632942261539 | 5.20045788450805  | 18.88630736060692 |
| H  | 10.29090428971099 | 4.65063392865270  | 17.44226830386630 |
| H  | 9.42107052901424  | 5.06373031586508  | 18.92843954995055 |
| C  | 7.82740569703311  | 6.28616893248504  | 17.17026512602574 |
| H  | 6.98778825899504  | 6.93101462141007  | 16.86778043433004 |
| H  | 7.76274367080734  | 6.21991585842752  | 18.26354974886242 |
| C  | 7.58567051208501  | 4.94706984721619  | 16.52136857551648 |
| C  | 6.69546474746016  | 3.99551865620762  | 17.00640762362992 |
| H  | 6.19351065675103  | 4.12349013611638  | 17.96637237217773 |
| C  | 6.43047729735772  | 2.86909545059846  | 16.21065030303797 |
| C  | 7.03687728894606  | 2.73451883853773  | 14.94905595926432 |
| H  | 6.79286674766367  | 1.88462369770731  | 14.30991649721519 |
| C  | 7.93271848034460  | 3.71805406867951  | 14.54550916043533 |
| C  | 8.64810816552677  | 3.75568525366044  | 13.21586860429871 |
| H  | 8.06662584583748  | 3.20724029850157  | 12.46061801254588 |
| H  | 9.62189440530310  | 3.26006995358748  | 13.31595736842230 |
| C  | 9.82105268427401  | 5.28508951322275  | 11.57480096389614 |
| C  | 11.25443142034441 | 4.90511900960571  | 11.96428993041302 |
| H  | 11.87283158530679 | 4.90080170467927  | 11.05646274396490 |
| H  | 11.32572112712160 | 3.89962778397419  | 12.40219702238487 |
| H  | 11.69970695416944 | 5.64000196971538  | 12.64972540453723 |
| C  | 9.35058159730752  | 4.34542036770954  | 10.45179249690383 |
| H  | 8.29442211673094  | 4.49619022308001  | 10.18024301623340 |

---

---

|   |                   |                   |                   |
|---|-------------------|-------------------|-------------------|
| H | 9.50050030144636  | 3.28490184028774  | 10.70158347598102 |
| H | 9.94307131011003  | 4.54820654397831  | 9.54853157323481  |
| C | 9.81716102182979  | 6.73251819555585  | 11.06359224522595 |
| H | 10.03307235369443 | 7.46189054906557  | 11.85282885753019 |
| H | 8.87238970937369  | 7.01526350187331  | 10.58030003046926 |
| H | 10.60030065535918 | 6.84007888067023  | 10.29985729671781 |
| C | 7.55373759483765  | 5.82369170660687  | 12.53825689927655 |
| H | 6.76347296562647  | 5.18235813021610  | 12.95952584250268 |
| H | 7.34131049515374  | 5.88004716736379  | 11.46376205752218 |
| C | 7.39424486004205  | 7.16872104850740  | 13.20124261037912 |
| C | 6.45358809408491  | 8.12023864300151  | 12.82364986803704 |
| H | 5.84947554419389  | 7.99029604955264  | 11.92476138999137 |
| C | 6.27993763849374  | 9.24864872769721  | 13.64186765333420 |
| C | 7.01575717285201  | 9.37926710709685  | 14.83271075209538 |
| H | 6.84056574352705  | 10.22592232476324 | 15.49777860348207 |
| C | 7.95587041556983  | 8.40255883596169  | 15.13401720500915 |
| C | 8.80695474977633  | 8.36432790077085  | 16.38401494251362 |
| H | 9.75131788318254  | 8.89705303139826  | 16.20725533882403 |
| H | 8.29120420645105  | 8.88665122941336  | 17.20384000001573 |

---



---

42

---



---

|    |                   |                   |                   |
|----|-------------------|-------------------|-------------------|
| Fe | 9.74482359230700  | 6.10007189126170  | 14.68356937783164 |
| Cl | 5.31561031798280  | 1.73629308181564  | 16.72566109106372 |
| Cl | 4.93953347688592  | 10.29276866605842 | 13.33569266601907 |
| O  | 11.55445992548306 | 8.27240514442603  | 13.99020828100262 |
| O  | 11.11297970404659 | 4.44884371947547  | 15.15565000577402 |
| H  | 10.87456557143221 | 3.65587445747864  | 15.66059001604703 |
| H  | 12.07467668475686 | 4.42197653659996  | 15.02507329385801 |
| N  | 10.99255161065130 | 7.29389418589395  | 14.23173975389916 |
| N  | 9.13649013196523  | 6.98104249175064  | 16.75569298536118 |
| N  | 8.28960352738139  | 4.74746473634940  | 15.34302723126319 |
| N  | 8.87988816144320  | 5.16377100132638  | 12.74666153315619 |
| N  | 8.16278932816669  | 7.37599184256315  | 14.26926822432148 |
| C  | 10.20637339078168 | 6.88847082211287  | 17.86508159028796 |
| C  | 11.57530655289315 | 7.30370388975891  | 17.31354839192474 |
| H  | 12.30668221773280 | 7.28680364518543  | 18.13401193172892 |
| H  | 11.58753351497453 | 8.32162316665485  | 16.89990949458119 |
| H  | 11.93430265442688 | 6.60312028538139  | 16.54709910000164 |
| C  | 9.84046625171922  | 7.79261908917827  | 19.05209548574354 |
| H  | 8.83105606378571  | 7.59046498008906  | 19.44259232315439 |
| H  | 9.91044356054597  | 8.86058494388687  | 18.79891171134659 |
| H  | 10.54296470534342 | 7.61064282690903  | 19.87797016118075 |
| C  | 10.31233517765300 | 5.43015800174212  | 18.33886237316363 |
| H  | 11.15443325556428 | 5.34380653534582  | 19.04031802807126 |
| H  | 10.51284384244097 | 4.75171560251970  | 17.50073741651656 |
| H  | 9.42112667513814  | 5.07585800470640  | 18.87305362011094 |
| C  | 7.87095996868949  | 6.29967442078603  | 17.15233622714453 |

|   |                   |                   |                   |
|---|-------------------|-------------------|-------------------|
| H | 7.02021690460279  | 6.92000036045153  | 16.82831517759125 |
| H | 7.77265582153057  | 6.23092635809094  | 18.24333083708843 |
| C | 7.65366555973331  | 4.95151391199222  | 16.50480715843994 |
| C | 6.72577601281101  | 4.02783299397592  | 16.97860132798430 |
| H | 6.20962545825215  | 4.17620394640923  | 17.92823370805492 |
| C | 6.43960889941894  | 2.90829661010101  | 16.18272894424755 |
| C | 7.04339999199972  | 2.76616062205376  | 14.91996488121403 |
| H | 6.76661934516375  | 1.93577202201096  | 14.26848407163971 |
| C | 7.97506517220806  | 3.72211925561052  | 14.53143678085818 |
| C | 8.66087202799045  | 3.75416886932080  | 13.18154792729639 |
| H | 8.06079469664265  | 3.18730889732789  | 12.45323510020763 |
| H | 9.63835877693835  | 3.25951504345684  | 13.24912905555857 |
| C | 9.79462785464169  | 5.27486904241681  | 11.51069432083821 |
| C | 11.21663987236698 | 4.82027222529754  | 11.86920653542889 |
| H | 11.85161762424492 | 4.91951939158756  | 10.97806148690770 |
| H | 11.26703549206565 | 3.76551074878355  | 12.17570136465898 |
| H | 11.66649453131620 | 5.44444652533835  | 12.65373811157325 |
| C | 9.27640373216157  | 4.40383211168464  | 10.35419538686564 |
| H | 8.23859483191375  | 4.63907871606194  | 10.07412525948343 |
| H | 9.34221480085619  | 3.32846552533214  | 10.57654746088568 |
| H | 9.89471610034978  | 4.58494693888571  | 9.46348731041604  |
| C | 9.84081921823514  | 6.74372829428643  | 11.06344712673913 |
| H | 10.12401710351477 | 7.42271267803848  | 11.87766766445218 |
| H | 8.88852333594506  | 7.09207792745549  | 10.64162655018153 |
| H | 10.59205971628320 | 6.85428292171563  | 10.26881491341716 |
| C | 7.55479460469908  | 5.81447094640016  | 12.52011347193359 |
| H | 6.76697071210500  | 5.16490307698121  | 12.93438278739217 |
| H | 7.32222628289285  | 5.89582796437903  | 11.45056642575997 |
| C | 7.38175989266937  | 7.15087539244701  | 13.20586511841152 |
| C | 6.36973354193891  | 8.04814879012214  | 12.87239761474366 |
| H | 5.73038356640654  | 7.88551914833976  | 12.00333602625326 |
| C | 6.16675820026860  | 9.15807445394496  | 13.70668281137747 |
| C | 6.94427001289041  | 9.32291955140145  | 14.86835282892294 |
| H | 6.74436498610226  | 10.14945180168800 | 15.55173830409746 |
| C | 7.94851516182652  | 8.39572157075556  | 15.11864282893275 |
| C | 8.82092603326155  | 8.38586458691292  | 16.35878604790971 |
| H | 9.76135490583191  | 8.91997869026486  | 16.16002024055898 |
| H | 8.30883535372812  | 8.93296411942042  | 17.16543771712277 |

---



---

62

---



---

|    |                   |                   |                   |
|----|-------------------|-------------------|-------------------|
| Fe | 9.70990704226600  | 6.02232730948592  | 14.68634508140166 |
| Cl | 5.25432391149402  | 1.74689653887681  | 16.73200053507749 |
| Cl | 5.04917296834761  | 10.35741602459038 | 13.29099881771655 |
| O  | 11.52763239651950 | 8.54517499293920  | 14.00430082006700 |
| O  | 11.24287635862684 | 4.58739806738689  | 15.12853182820960 |
| H  | 11.09706789226618 | 3.77114850564312  | 15.63269136448578 |
| H  | 12.20156821071745 | 4.66902890527886  | 14.99562048930378 |

|   |                   |                  |                   |
|---|-------------------|------------------|-------------------|
| N | 11.12636331633291 | 7.47339158612087 | 14.14577104934863 |
| N | 9.14099445661869  | 6.95665943062505 | 16.76489937149579 |
| N | 8.27618796272121  | 4.70280457484002 | 15.35482035524742 |
| N | 8.84950919945358  | 5.12930773960271 | 12.74174603742740 |
| N | 8.20096719308995  | 7.36789665791173 | 14.24700376934679 |
| C | 10.19750435922855 | 6.86816556420673 | 17.88256886981074 |
| C | 11.56083060075713 | 7.32250407080382 | 17.34707887329915 |
| H | 12.30225062719128 | 7.25368739413108 | 18.15577621910916 |
| H | 11.56628928299251 | 8.36576213193318 | 17.00175216351625 |
| H | 11.91281148213394 | 6.68035315289274 | 16.52830724604977 |
| C | 9.80932134511265  | 7.74215152286755 | 19.08561419674407 |
| H | 8.81248280849696  | 7.49566707353682 | 19.48192972771707 |
| H | 9.83509782391830  | 8.81562772187780 | 18.84738463242411 |
| H | 10.52545816468364 | 7.57688197673243 | 19.90345201598601 |
| C | 10.32277764429859 | 5.40346615060907 | 18.33174673251113 |
| H | 11.15268311486615 | 5.31633135611751 | 19.04757034983989 |
| H | 10.54650387148513 | 4.74018609615255 | 17.48675946945682 |
| H | 9.42667617911946  | 5.02628294478352 | 18.84179322843829 |
| C | 7.86881933027266  | 6.28021633262211 | 17.15114448898375 |
| H | 7.02396570975649  | 6.90309904247671 | 16.81559210542083 |
| H | 7.75709684290964  | 6.21791456606883 | 18.24157206451553 |
| C | 7.63907380422419  | 4.92695756251103 | 16.51208615671885 |
| C | 6.69475376023314  | 4.01895050481038 | 16.98415106312754 |
| H | 6.17655116023502  | 4.17622845091721 | 17.93132387829633 |
| C | 6.39460287932496  | 2.90277034070898 | 16.18803029684874 |
| C | 6.99382841726866  | 2.75031038754676 | 14.92327696870972 |
| H | 6.69956392954994  | 1.92616047951554 | 14.27156971677051 |
| C | 7.94334648161946  | 3.68849420068673 | 14.53626891086590 |
| C | 8.62406151079803  | 3.72085514945829 | 13.18036132748701 |
| H | 8.01816264425078  | 3.15415071302466 | 12.45629334412275 |
| H | 9.59946914375231  | 3.21957118602395 | 13.24162601714718 |
| C | 9.76370928244036  | 5.24443497237255 | 11.50820411982309 |
| C | 11.19146642245236 | 4.82001331130571 | 11.87752092754953 |
| H | 11.82536416983108 | 4.89782038192949 | 10.98352092804730 |
| H | 11.25802634203082 | 3.77906119821560 | 12.22531449682729 |
| H | 11.63018538131849 | 5.48031303701436 | 12.63915695876262 |
| C | 9.26204778585709  | 4.35975324089267 | 10.35611133573145 |
| H | 8.21905928919817  | 4.57581837847894 | 10.07851490215550 |
| H | 9.34683400926968  | 3.28662878608837 | 10.58339876976700 |
| H | 9.87470822705111  | 4.54771902588621 | 9.46296303610591  |
| C | 9.79476566573707  | 6.71277611047933 | 11.05511171110114 |
| H | 10.05642478899114 | 7.39485288689071 | 11.87482731338563 |
| H | 8.84400112236083  | 7.04636750199325 | 10.61842117325712 |
| H | 10.55631701589544 | 6.83149271236432 | 10.27152954867876 |
| C | 7.53548658267233  | 5.79803543971667 | 12.52464398783273 |
| H | 6.74581090803946  | 5.17783355968193 | 12.97881598690583 |
| H | 7.27568777200707  | 5.85600968606160 | 11.45938881950484 |
| C | 7.40860776799048  | 7.15329948095159 | 13.18650818985435 |
| C | 6.41933596209043  | 8.07188783521290 | 12.84575043925175 |

|   |                  |                   |                   |
|---|------------------|-------------------|-------------------|
| H | 5.77694633933344 | 7.91951142970255  | 11.97713873031086 |
| C | 6.24143990968585 | 9.19051176843667  | 13.67437516232233 |
| C | 7.00945097057638 | 9.33388790580239  | 14.84472491102995 |
| H | 6.81715580737439 | 10.16029195304233 | 15.53046665741486 |
| C | 7.99259485799553 | 8.38624523216719  | 15.10148319789909 |
| C | 8.83980715389339 | 8.35927718736215  | 16.35929710243748 |
| H | 9.78661970542696 | 8.88877788475781  | 16.18279579726332 |
| H | 8.31370893354637 | 8.91310868687466  | 17.15306921373390 |

---



---

**Final structure (after geometry optimization for CASSCF calculation from BAGEL)**

---



---

|    |              |              |              |
|----|--------------|--------------|--------------|
| Fe | 9.706232031  | 6.099922776  | 14.686653017 |
| Cl | 5.683169488  | 1.429607324  | 16.815949590 |
| Cl | 4.777926364  | 10.181730259 | 13.334477391 |
| O  | 12.144823025 | 8.725320712  | 13.849424128 |
| O  | 11.489946105 | 4.819730382  | 15.070961055 |
| H  | 11.414766047 | 4.018435059  | 15.577400334 |
| H  | 12.406964222 | 4.906517809  | 14.834872302 |
| N  | 11.440822890 | 7.847409906  | 13.966211360 |
| N  | 9.021245759  | 6.994464804  | 16.857565797 |
| N  | 8.305050445  | 4.671885362  | 15.353172499 |
| N  | 8.799225009  | 5.142787717  | 12.668260239 |
| N  | 8.054872768  | 7.362610949  | 14.281791796 |
| C  | 10.068751756 | 7.050930692  | 17.965925227 |
| C  | 11.375028328 | 7.646028567  | 17.426889556 |
| H  | 12.098167351 | 7.708420397  | 18.238052660 |
| H  | 11.265547578 | 8.654019434  | 17.035394453 |
| H  | 11.815287690 | 7.013617828  | 16.656340940 |
| C  | 9.594151830  | 7.894051608  | 19.161099100 |
| H  | 8.627001948  | 7.571834259  | 19.545677175 |
| H  | 9.527762847  | 8.953419653  | 18.919580477 |
| H  | 10.308952568 | 7.798421983  | 19.977207418 |
| C  | 10.375575364 | 5.625345392  | 18.445644933 |
| H  | 11.239144924 | 5.651695404  | 19.106892669 |
| H  | 10.620764159 | 4.963632840  | 17.615694860 |
| H  | 9.563773634  | 5.175315724  | 19.011562589 |
| C  | 7.856027373  | 6.157498190  | 17.231981362 |
| H  | 6.940348956  | 6.687060595  | 16.967093685 |
| H  | 7.795594589  | 6.016962680  | 18.305718801 |
| C  | 7.731632957  | 4.806381384  | 16.539578284 |
| C  | 6.916904003  | 3.806501996  | 17.044049878 |
| H  | 6.457137512  | 3.885999348  | 18.018116190 |
| C  | 6.673879751  | 2.698211705  | 16.239655399 |
| C  | 7.196815821  | 2.633496799  | 14.947136357 |
| H  | 6.952731292  | 1.806377634  | 14.297177528 |
| C  | 8.016174073  | 3.664857390  | 14.536325938 |
| C  | 8.603800847  | 3.748039480  | 13.132641846 |
| H  | 7.951888274  | 3.189131633  | 12.461641648 |

|   |              |              |              |
|---|--------------|--------------|--------------|
| H | 9.562327868  | 3.236392518  | 13.126818469 |
| C | 9.656383044  | 5.226650715  | 11.405520036 |
| C | 11.101030612 | 4.819530807  | 11.719570731 |
| H | 11.691115208 | 4.878334913  | 10.806268992 |
| H | 11.196837307 | 3.800200740  | 12.088051798 |
| H | 11.563967370 | 5.497802157  | 12.436558423 |
| C | 9.118688275  | 4.316944586  | 10.288971811 |
| H | 8.069493691  | 4.505853488  | 10.062613008 |
| H | 9.230777389  | 3.259859798  | 10.525520251 |
| H | 9.679387328  | 4.499287880  | 9.373095518  |
| C | 9.684884082  | 6.678918854  | 10.905304231 |
| H | 9.968495556  | 7.378082548  | 11.691006985 |
| H | 8.738260115  | 7.007498026  | 10.484027956 |
| H | 10.423417857 | 6.763667613  | 10.110617894 |
| C | 7.487706653  | 5.807920613  | 12.493463023 |
| H | 6.707017259  | 5.164961380  | 12.901107932 |
| H | 7.235257889  | 5.925106729  | 11.445356775 |
| C | 7.305712593  | 7.137195400  | 13.210886550 |
| C | 6.282338804  | 8.003568282  | 12.867056638 |
| H | 5.677607088  | 7.843909310  | 11.986647828 |
| C | 6.025091166  | 9.076263622  | 13.713514221 |
| C | 6.746063090  | 9.225619593  | 14.898383578 |
| H | 6.499886245  | 10.013781106 | 15.594741866 |
| C | 7.761646659  | 8.326286161  | 15.150066485 |
| C | 8.565848263  | 8.342115953  | 16.441847982 |
| H | 9.430640015  | 8.985848446  | 16.304005890 |
| H | 7.951948715  | 8.813081329  | 17.209741283 |

**Supplementary Table S9.** Vibrational frequencies (in  $\text{cm}^{-1}$ ) of the optimized structures.

22

23.70 46.20 74.57 86.78 92.62 96.85 112.63 123.87  
133.03 144.87 148.39 149.36 153.94 167.81 175.02  
191.93 199.30 209.22 215.47 220.07 222.62 225.65  
241.99 245.18 255.78 268.85 274.75 281.73 287.41  
291.44 303.58 315.03 323.97 329.04 331.87 345.10  
348.98 359.32 375.67 383.00 401.33 406.46 411.93  
418.10 438.87 442.04 450.81 461.59 483.46 490.07  
494.26 504.57 528.43 533.87 544.45 546.97 558.63  
560.57 575.96 576.93 590.17 632.30 644.09 698.05  
709.82 727.00 751.07 762.16 786.39 826.81 842.93  
872.53 888.99 895.31 898.25 908.10 910.38 927.23  
929.59 932.53 937.82 939.06 942.64 959.91 967.43  
968.13 970.83 1015.39 1019.16 1031.60 1034.85 1043.53  
1046.98 1055.63 1060.06 1064.34 1069.05 1099.71 1102.10  
1119.01 1121.50 1186.64 1192.85 1206.71 1211.91 1236.60  
1252.52 1253.86 1257.30 1262.14 1273.84 1280.31 1284.41  
1307.35 1314.12 1322.74 1329.69 1363.27 1371.10 1381.73  
1386.53 1393.48 1399.73 1400.42 1404.69 1423.91 1426.20  
1448.57 1451.06 1451.70 1457.27 1457.88 1459.64 1461.57  
1462.94 1465.76 1469.29 1473.02 1478.61 1483.62 1486.61  
1487.57 1488.45 1491.59 1492.55 1496.09 1498.07 1583.73  
1609.83 1614.71 1646.56 1653.07 1887.70 1987.60 3047.39  
3048.14 3054.90 3062.28 3065.58 3066.99 3068.87 3074.13  
3076.17 3083.37 3128.99 3130.90 3132.46 3134.76 3137.68  
3139.52 3140.74 3141.50 3143.70 3144.65 3148.11 3149.06  
3149.84 3150.63 3162.51 3179.53 3216.54 3217.52 3218.17  
3219.26 3767.70 3850.79

42

20.80 37.04 55.47 71.80 78.29 85.87 93.01 109.60  
110.54 127.60 140.66 144.54 146.64 152.34 173.51  
183.69 191.12 198.50 206.40 207.78 214.94 222.92  
228.54 234.49 248.50 254.43 265.03 271.35 278.62  
285.82 288.11 290.53 302.98 304.27 308.73 319.17  
322.91 325.94 343.60 356.16 368.70 377.38 392.84  
397.79 409.74 415.32 432.39 447.92 458.28 473.28  
477.23 487.50 495.14 504.82 529.66 534.53 541.61  
546.21 562.02 564.42 574.64 588.62 632.37 652.90  
695.61 708.69 727.25 757.64 779.55 786.81 846.26  
847.88 876.65 888.19 895.54 898.62 910.39 913.73  
925.61 929.15 935.20 935.66 937.91 949.89 958.67  
960.02 970.31 978.71 1015.06 1022.18 1030.78 1038.06  
1040.36 1047.88 1053.67 1055.77 1063.70 1067.45 1110.87  
1112.64 1120.21 1120.92 1189.69 1192.54 1204.38 1208.70

1250.98 1252.24 1257.31 1257.90 1265.08 1275.30 1284.04  
1289.91 1306.90 1313.05 1327.66 1333.58 1366.41 1372.52  
1380.92 1388.63 1397.18 1400.10 1400.99 1405.93 1424.52  
1426.13 1449.22 1452.27 1454.25 1454.84 1455.92 1457.64  
1459.83 1461.94 1463.29 1470.84 1475.79 1477.41 1479.82  
1482.85 1485.82 1487.35 1490.75 1491.69 1492.77 1493.40  
1608.83 1611.55 1615.63 1645.85 1648.86 1949.33 3047.21  
3049.39 3056.42 3058.46 3059.90 3061.61 3066.96 3070.54  
3072.28 3072.50 3120.51 3126.11 3127.03 3130.32 3132.52  
3134.58 3138.60 3138.63 3141.74 3141.86 3143.87 3147.63  
3147.67 3148.16 3165.36 3169.33 3214.16 3214.74 3215.43  
3217.04 3758.10 3848.10

---

---

62

---

---

16.09 21.67 41.38 53.92 70.63 79.04 81.81 97.54  
105.44 108.06 133.97 137.94 145.58 146.41 151.37  
163.40 175.91 183.65 194.44 202.56 208.75 213.01  
222.22 223.34 227.33 229.84 244.44 255.60 262.69  
268.74 273.48 275.34 285.02 289.75 293.24 296.25  
309.86 311.66 318.67 324.98 340.89 354.60 371.27  
390.25 397.50 409.96 410.71 429.92 448.28 472.46  
474.36 486.28 492.69 495.39 529.29 531.33 538.90  
546.65 561.61 564.27 574.00 589.11 633.50 652.40  
695.71 708.28 726.03 756.69 778.07 785.55 846.83  
848.45 876.53 888.05 895.49 898.75 910.06 913.01  
925.85 926.33 934.10 935.61 938.76 950.43 956.12  
958.21 970.25 978.06 1014.80 1021.97 1029.20 1035.71  
1039.85 1048.56 1052.19 1055.15 1064.21 1068.02 1112.66  
1114.73 1119.95 1121.04 1191.64 1195.10 1204.01 1208.26  
1252.81 1254.20 1256.00 1256.27 1265.05 1275.14 1283.59  
1288.80 1306.36 1312.22 1326.69 1333.25 1366.37 1372.56  
1380.02 1387.39 1397.44 1398.90 1400.65 1404.35 1424.87  
1425.17 1448.98 1450.43 1453.39 1453.86 1455.96 1456.60  
1459.28 1461.16 1462.26 1469.52 1475.54 1476.88 1479.01  
1482.40 1484.85 1486.46 1490.20 1491.28 1491.67 1492.88  
1608.34 1610.52 1613.17 1644.80 1647.53 1949.27 3047.59  
3048.21 3053.28 3057.69 3058.10 3059.81 3063.83 3066.80  
3068.70 3070.75 3121.74 3122.65 3123.14 3126.93 3130.82  
3131.14 3136.92 3137.54 3138.03 3141.69 3142.56 3146.94  
3147.66 3149.32 3157.87 3163.44 3214.63 3214.67 3215.13  
3216.67 3754.17 3840.46

## VI. References

1. Kim, K., Oh, S., Jeong, D., Lee, Y., Moon, D., Lee, S. & Cho, J. Systematic electronic tuning on the property and reactivity of cobalt–(hydro)peroxo intermediates. *Inorg. Chem.* **62**, 7141–7149 (2023).
2. Evans, D. 400. The determination of the paramagnetic susceptibility of substances in solution by nuclear magnetic resonance. *J. Chem. Soc. (Resumed)*, 2003–2005 (1959).
3. Loliger, J. & Scheffold, R. Paramagnetic moment measurements by nmr. a micro technique. *J. Chem. Educ.* **49**, 646 (1972).
4. Kumar, P. et al. Reactions of Co(III)–nitrosyl complexes with superoxide and their mechanistic insights. *J. Am. Chem. Soc.* **137**, 4284–4287 (2015).
5. Kumar, P., Lee, Y.-M., Park, Y. J., Siegler, M. A., Karlin, K. D. & Nam, W. Factors that control the reactivity of cobalt(III)–nitrosyl complexes in nitric oxide transfer and dioxygenation reactions: a combined experimental and theoretical investigation. *J. Am. Chem. Soc.* **138**, 7753–7762 (2016).
6. Shin, J. W., Eom, K. & Moon, D. BL2D-SMC, the supramolecular crystallography beamline at the Pohang Light Source II, Korea. *J. Synchrotron Radiat.* **23**, 369–373 (2016).
7. Otwinowski, Z. & Minor, W. Processing of X-ray diffraction data collected in oscillation mode. *Methods Enzymol.* **276**, 307–326 (1997).
8. Sheldrick, G. M. SHELXT – Integrated space-group and crystal-structure determination. *Acta Crystallogr. Sect. Found. Adv.* **71**, 3–8 (2015).
9. Sheldrick, G. M. Crystal structure refinement with SHELXL. *Acta Crystallogr. C Struct. Chem.* **71**, 3–8 (2015).
10. Khusnutdinova, J. R., Luo, J., Rath, N. P. & Mirica, L. M. Late first-row transition metal complexes of a tetradentate pyridinophane ligand: electronic properties and reactivity implications. *Inorg. Chem.* **52**, 3920–3932 (2013).
11. Parr, R. G. & Weitao, Y. *Density-Functional Theory of Atoms and Molecules*. (Oxford University Press, 1994).
12. Neese, F., Wennmohs, F., Becker, U. & Riplinger, C. The ORCA quantum chemistry program package. *J. Chem. Phys.* **152**, 224108 (2020).
13. Slater, J. C. *The Self-Consistent Field for Molecules and Solids: Quantum Theory of Molecules and Solids*. (McGraw-Hill Book Company, 1974).

14. Vosko, S. H., Wilk, L. & Nusair, M. Accurate spin-dependent electron liquid correlation energies for local spin density calculations: a critical analysis. *Can. J. Phys.* **58**, 1200–1211 (1980).
15. Becke, A. D. Density-functional exchange-energy approximation with correct asymptotic behavior. *Phys. Rev. A Gen. Phys.* **38**, 3098–3100 (1988).
16. Lee, C., Yang, W. & Parr, R. G. Development of the Colle-Salvetti correlation-energy formula into a functional of the electron density. *Phys. Rev. B* **37**, 785–789 (1988).
17. Becke, A. D. Density-functional thermochemistry. III. The role of exact exchange. *J. Chem. Phys.* **98**, 5648–5652 (1993).
18. Grimme, S., Antony, J., Ehrlich, S. & Krieg, H. A consistent and accurate ab initio parametrization of density functional dispersion correction (DFT-D) for the 94 elements H-Pu. *J. Chem. Phys.* **132**, 154104 (2010).
19. Weigend, F. & Ahlrichs, R. Balanced basis sets of split valence, triple zeta valence and quadruple zeta valence quality for H to Rn: Design and assessment of accuracy. *Phys. Chem. Chem. Phys.* **7**, 3297–3305 (2005).
20. Dunlap, B. I., Connolly, J. W. D. & Sabin, J. R. On some approximations in applications of X $\alpha$  theory. *J. Chem. Phys.* (1979).
21. Vahtras, O., Almlöf, J. & Feyereisen, M. W. Integral approximations for LCAO-SCF calculations. *Chem. Phys. Lett.* **213**, 514–518 (1993).
22. Neese, F., Wennmohs, F., Hansen, A. & Becker, U. Efficient, approximate and parallel Hartree–Fock and hybrid DFT calculations. A ‘chain-of-spheres’ algorithm for the Hartree–Fock exchange. *Chem. Phys.* **356**, 98–109 (2009).
23. Izsák, R. & Neese, F. An overlap fitted chain of spheres exchange method. *J. Chem. Phys.* **135**, 144105 (2011).
24. Izsák, R., Neese, F. & Klopper, W. Robust fitting techniques in the chain of spheres approximation to the Fock exchange: The role of the complementary space. *J. Chem. Phys.* **139**, 094111 (2013).
25. Weigend, F. Accurate Coulomb-fitting basis sets for H to Rn. *Phys. Chem. Chem. Phys.* **8**, 1057–1065 (2006).
26. Barone, V. & Cossi, M. Quantum calculation of molecular energies and energy gradients in solution by a conductor solvent model. *J. Phys. Chem. A* **102**, 1995–2001 (1998).

27. Garcia-Ratés, M. & Neese, F. Effect of the solute cavity on the solvation energy and its derivatives within the framework of the Gaussian charge scheme. *J. Comput. Chem.* **41**, 922–939 (2020).
28. Veryazov, V., Malmqvist, P. Å. & Roos, B. O. How to select active space for multiconfigurational quantum chemistry? *Int. J. Quantum Chem.* **111**, 3329–3338 (2011).
29. Pierloot, K. The CASPT2 method in inorganic electronic spectroscopy: from ionic transition metal to covalent actinide complexes\*. *Mol. Phys.* **101**, 2083–2094 (2003).
30. Pettersen, E. F. *et al.* UCSF Chimera--a visualization system for exploratory research and analysis. *J. Comput. Chem.* **25**, 1605–1612 (2004).
31. Shiozaki, T. BAGEL: Brilliantly advanced general electronic-structure library. *Wiley Interdiscip. Rev. Comput. Mol. Sci.* **8**, e1331 (2018).
32. Maji, R. C., Barman, S. K., Roy, S., Chatterjee, S. K., Bowles, F. L., Olmstead, M. M. & Patra, A. K. Copper complexes relevant to the catalytic cycle of copper nitrite reductase: electrochemical detection of NO(g) evolution and flipping of NO<sub>2</sub> binding mode upon Cu<sup>II</sup> → Cu<sup>I</sup> reduction. *Inorg. Chem.* **52**, 11084–11095 (2013).
